# Supplementary material for: Synthesis, characterization, and optical properties of novel 1,3-dithiole donor-based chromophores
Source: Royal Society of Chemistry journal article supplement (doi:10.1039/c2ra23235a), 2012-12-20
Supplement: c2ra23235a.pdf [file c2ra23235a.pdf]

## SUPPLEMENTARY DATA FOR

# Synthesis, Characterization, and Optical Properties of Novel 1,3-Dithiole Donor-Based Chromophores

Natalia Martínez de Baroja,<sup>a</sup> Santiago Franco,\*<sup>a</sup> Javier Garín,<sup>a</sup> Jesús Orduna,<sup>a</sup> Belén Villacampa,\*<sup>b</sup> Pilar Borja<sup>a</sup> and Raquel Alicante<sup>b</sup>

<sup>a</sup>*Departamento de Química Orgánica and* <sup>b</sup>*Departamento de Física de la Materia Condensada, Universidad de Zaragoza-CSIC, Instituto de Ciencia de Materiales de Aragón, 50009 Zaragoza, Spain*

[sfranco@unizar.es](mailto:sfranco@unizar.es); [bvillaca@unizar.es](mailto:bvillaca@unizar.es)

### **TABLE OF CONTENTS**

|                                                                 |               |
|-----------------------------------------------------------------|---------------|
| Figures S-1 to S-2 (NMR spectra of compound <b>5</b> )          | page S2       |
| Figures S-3 to S-4 (NMR spectra of compound <b>8b</b> )         | page S3       |
| Figures S-5 to S-6 (NMR spectra of compound <b>8c</b> )         | page S4       |
| Figure S-7 to S-8 (NMR spectra of compound <b>9a</b> )          | page S5       |
| Figures S-9 to S-10 (NMR spectra of compound <b>9b</b> )        | page S6       |
| Figure S-11 (NMR spectra of compound <b>9c</b> )                | page S7       |
| Figure S-12 (NMR spectra of compound <b>10a</b> )               | page S7       |
| Figures S-13 to S-14 (NMR spectra of compound <b>10b</b> )      | page S8       |
| Figures S-15 to S-16 (NMR spectra of compound <b>10c</b> )      | page S9       |
| Figure S-17 (nOe experiment of compound <b>9a</b> )             | page S10      |
| Figure S-18 (nOe experiment of compound <b>10b</b> )            | page S11      |
| Figure S-19 (nOe experiment of compound <b>10c</b> )            | page S12      |
| Figures S-20 to S-25 (Normalized UV-Vis absorption)             | pages S13-S15 |
| Figures S-26 to S-27 (UV-Vis absorption of polycarbonate films) | page S16      |
| Computational procedures                                        | pages S18-S24 |

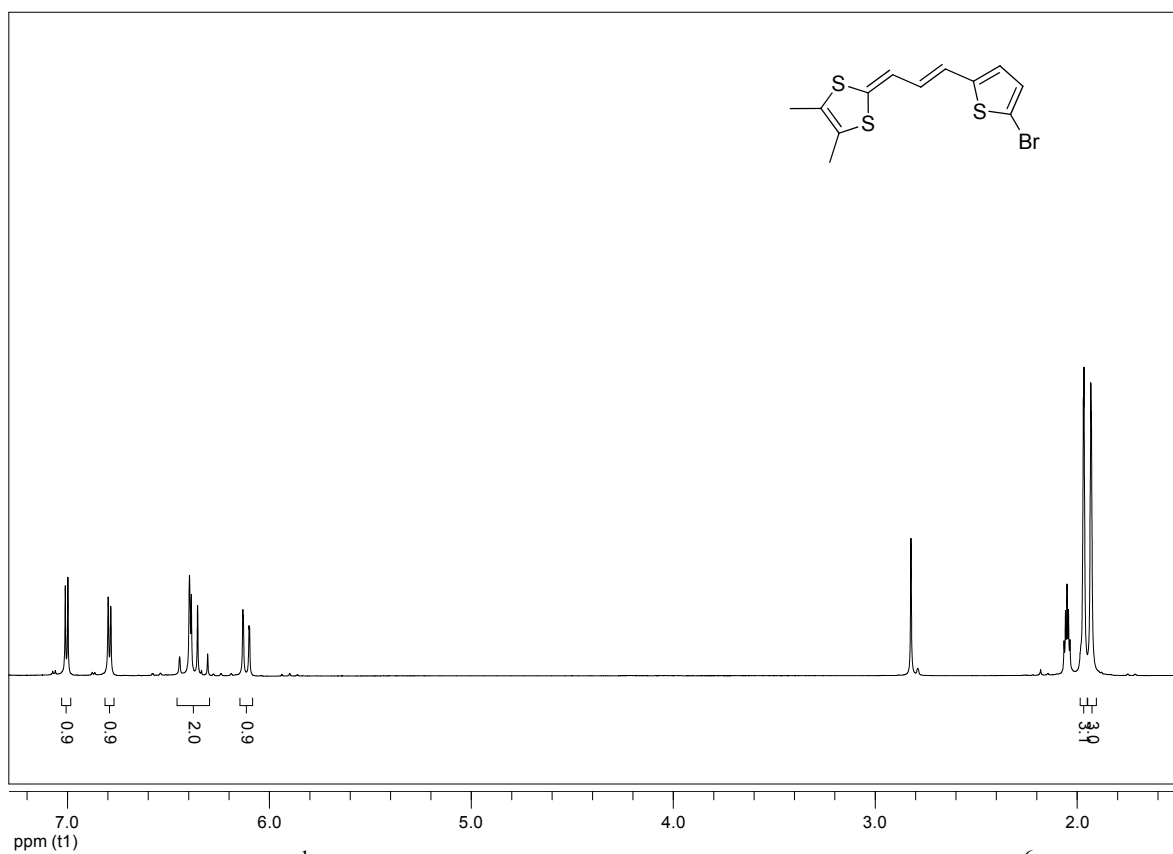

**Figure S-1:** <sup>1</sup>H NMR spectrum of compound **5** (300 MHz, acetone-d<sup>6</sup>).

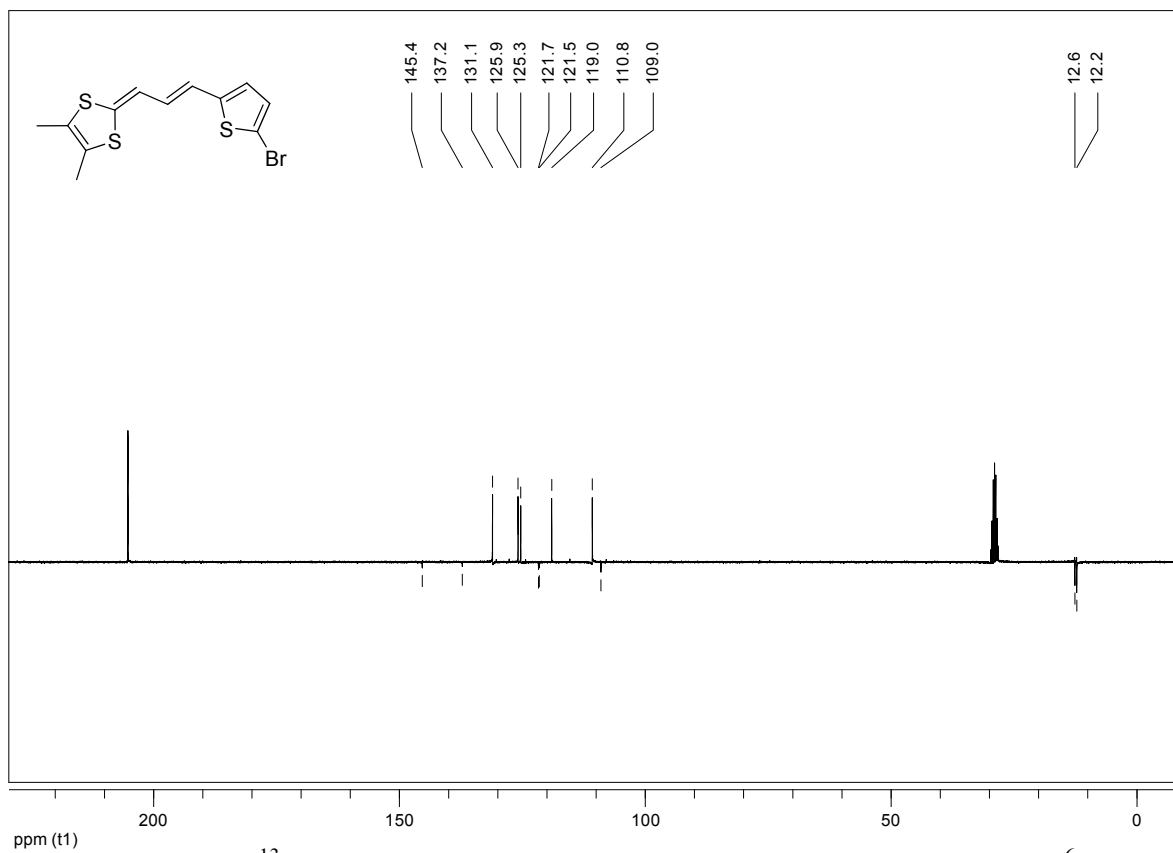

**Figure S-2:** <sup>13</sup>C NMR (APT) spectrum of compound **5** (75 MHz, acetone-d<sup>6</sup>).

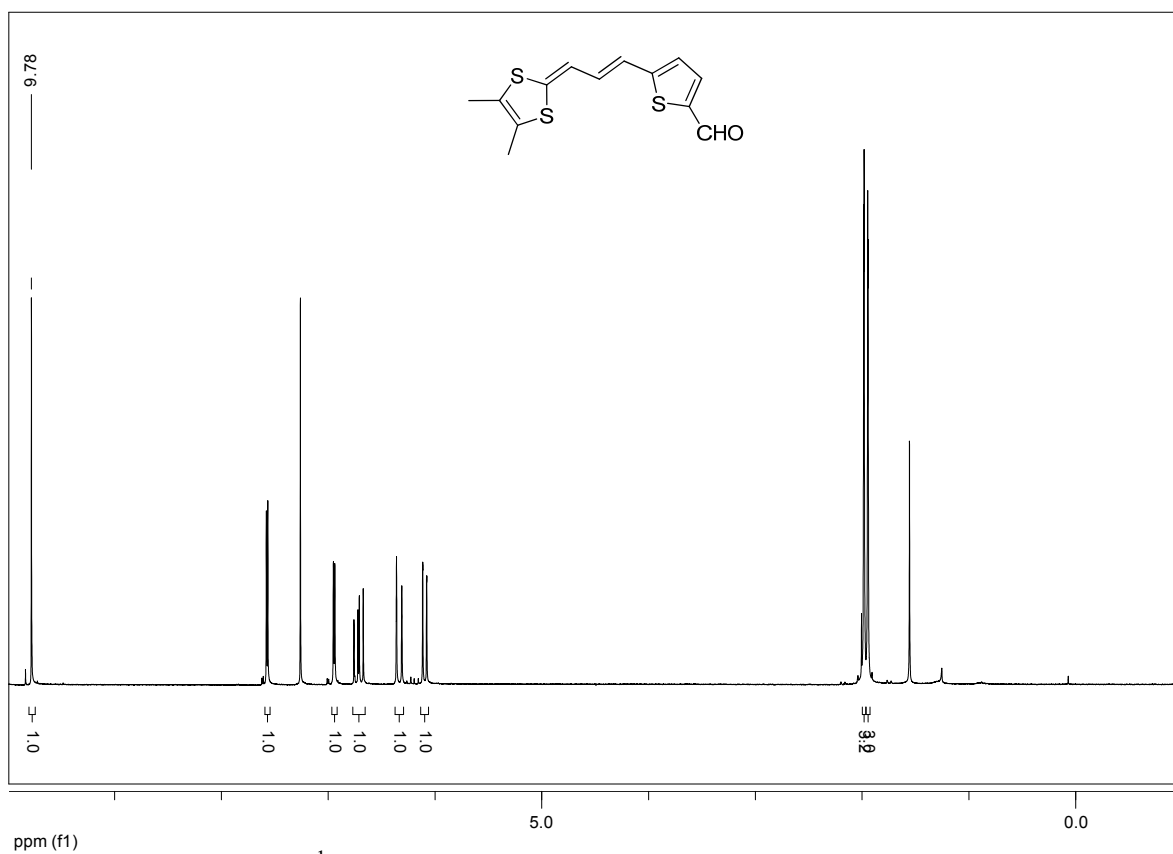

**Figure S-3:** <sup>1</sup>H NMR spectrum of compound **8b** (300 MHz, CDCl<sub>3</sub>).

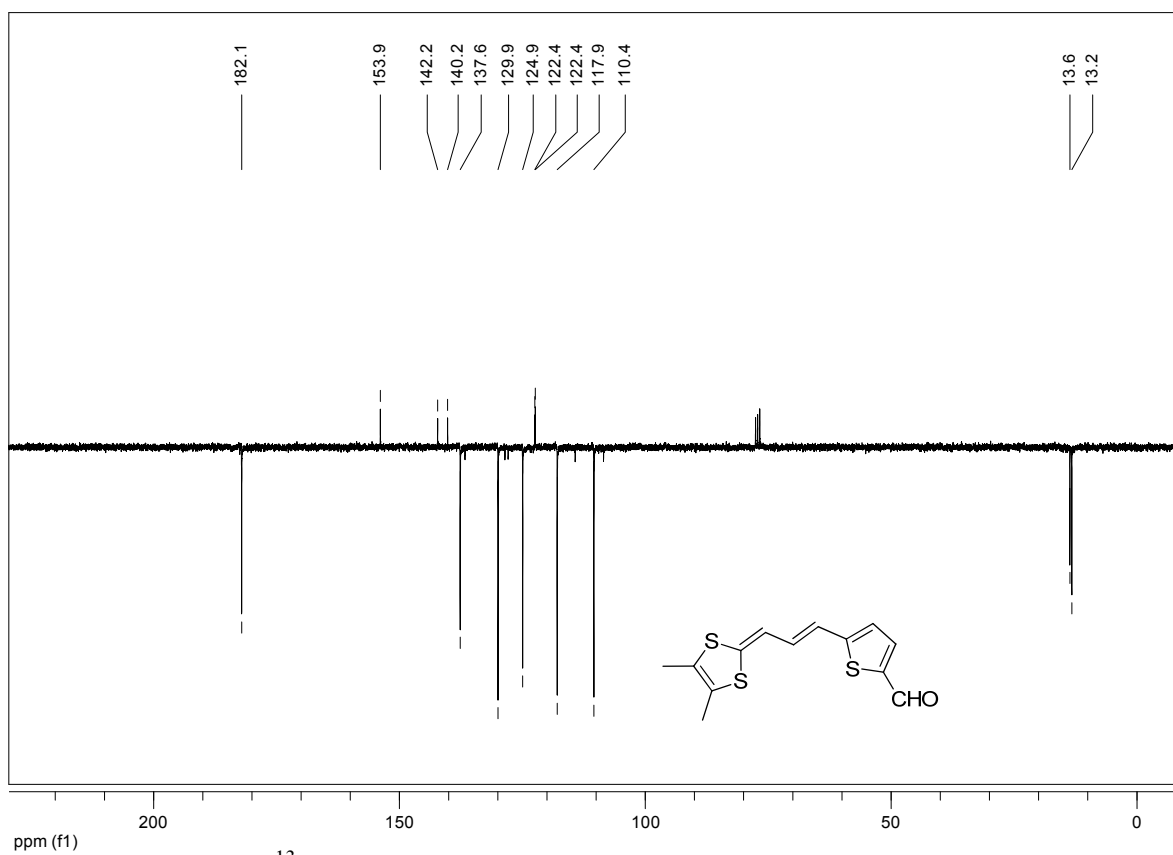

**Figure S-4:** <sup>13</sup>C NMR (APT) spectrum of compound **8b** (75 MHz, CDCl<sub>3</sub>).

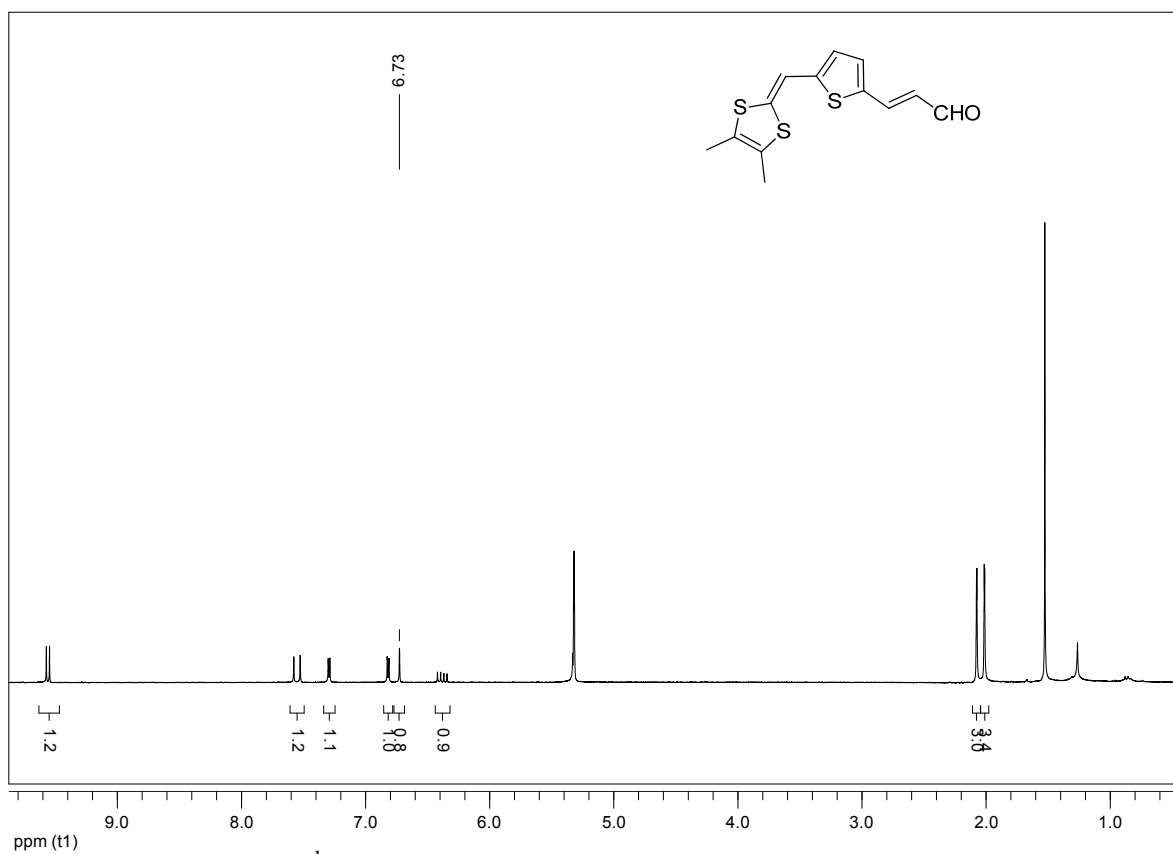

**Figure S-5:** <sup>1</sup>H NMR spectrum of compound **8c** (300 MHz, CD<sub>2</sub>Cl<sub>2</sub>).

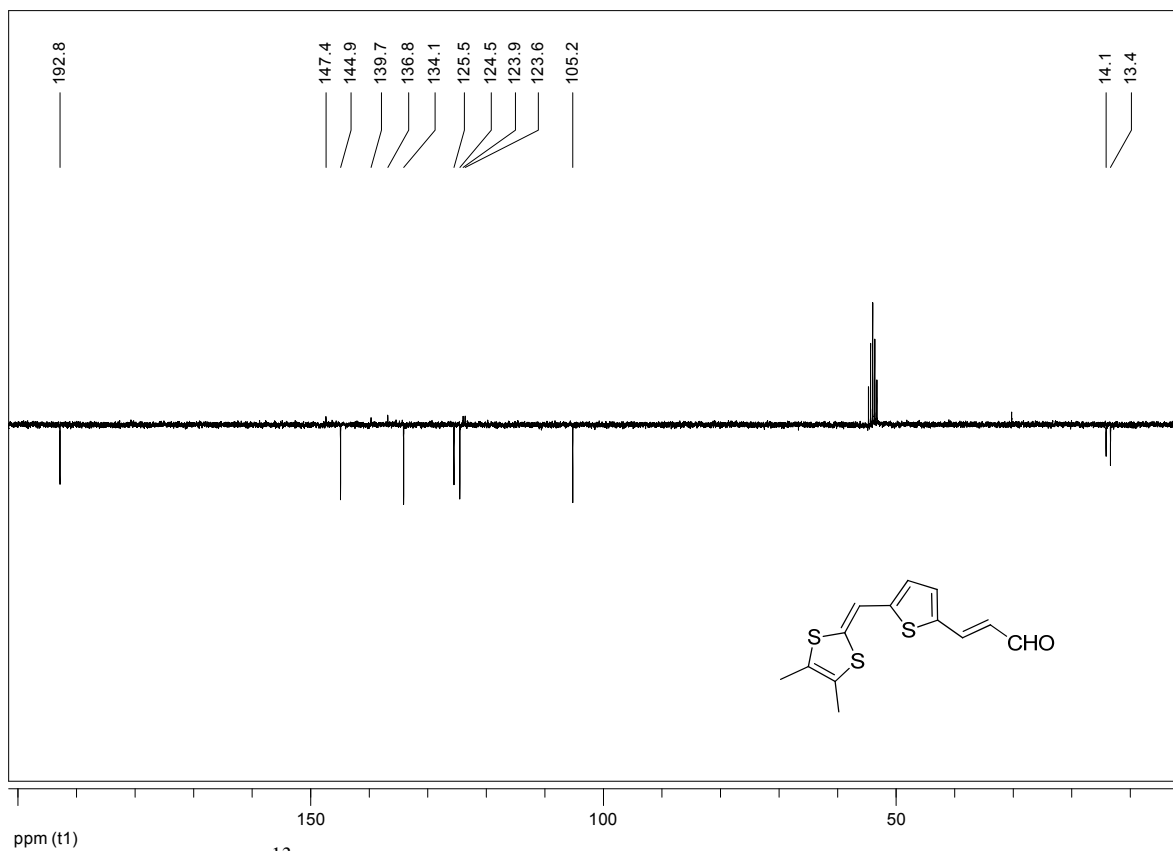

**Figure S-6:** <sup>13</sup>C NMR (APT) spectrum of compound **8c** (75 MHz, CD<sub>2</sub>Cl<sub>2</sub>).

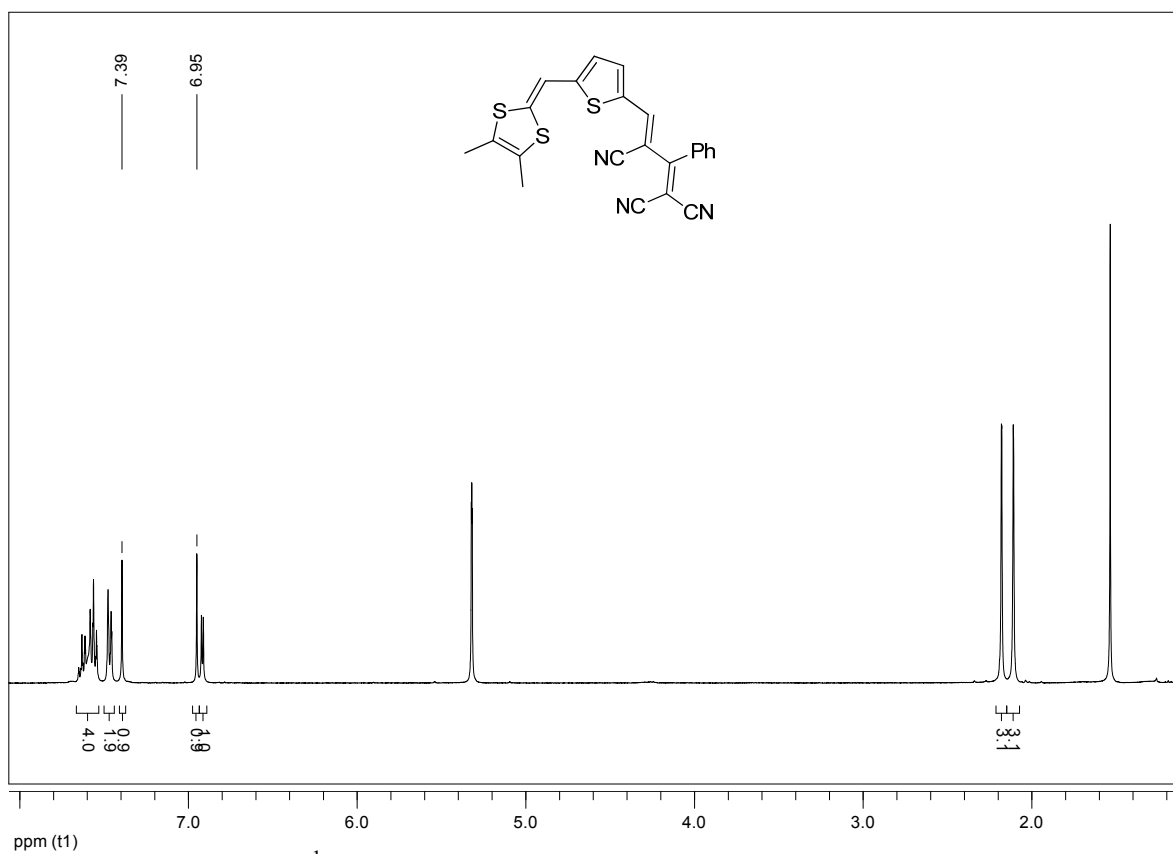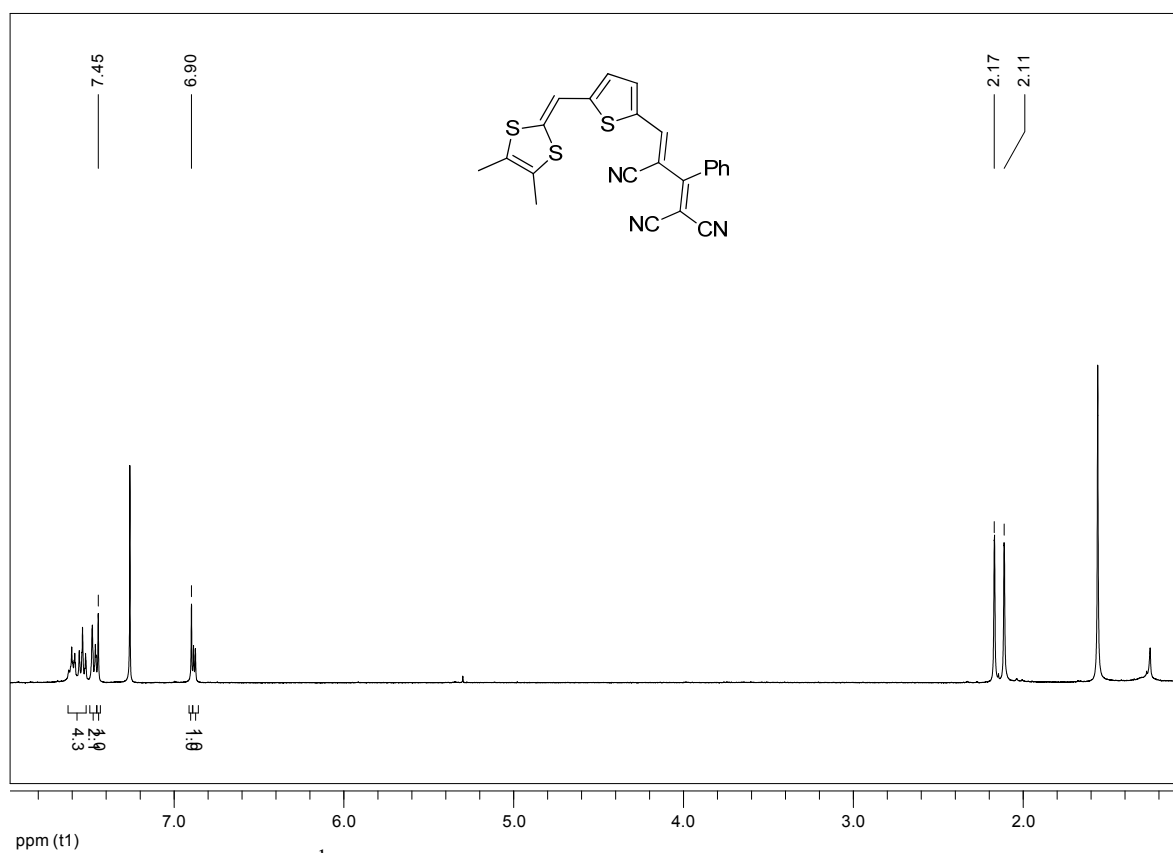

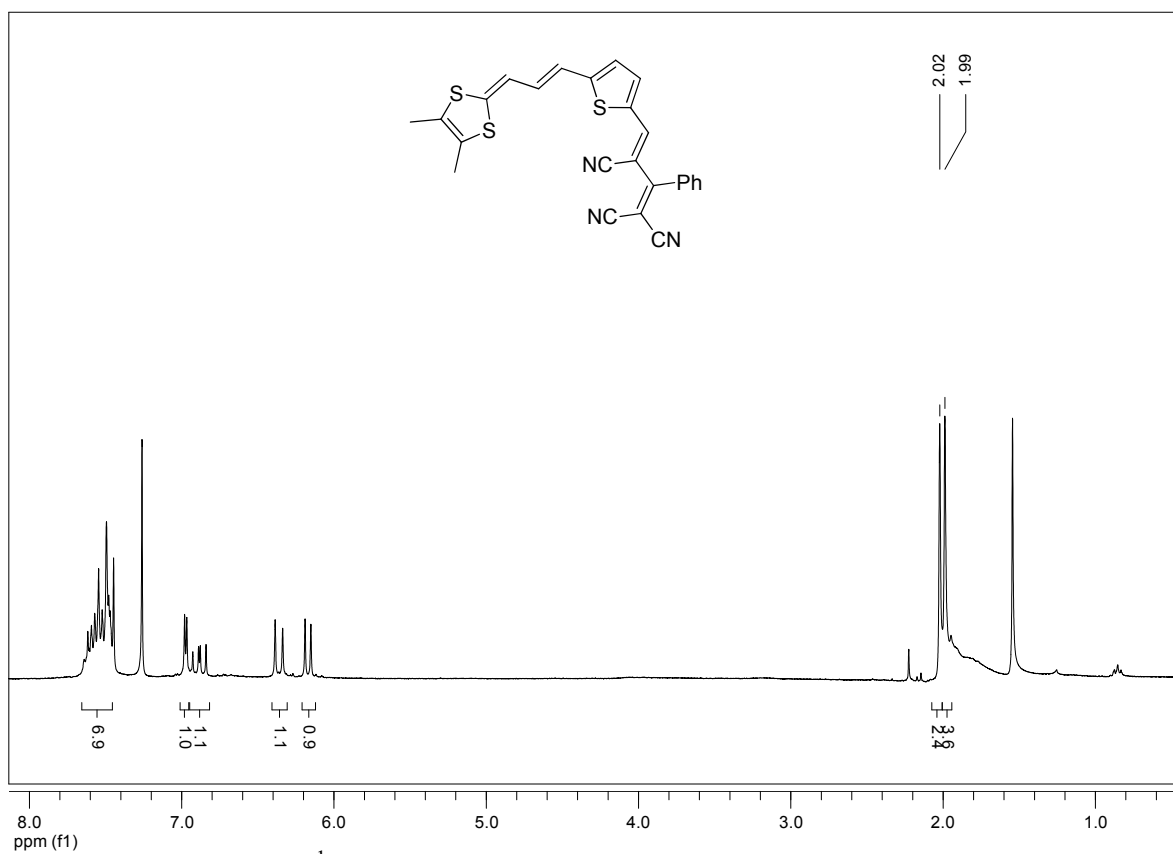

**Figure S-9:** <sup>1</sup>H NMR spectrum of compound **9b** (300 MHz, CDCl<sub>3</sub>).

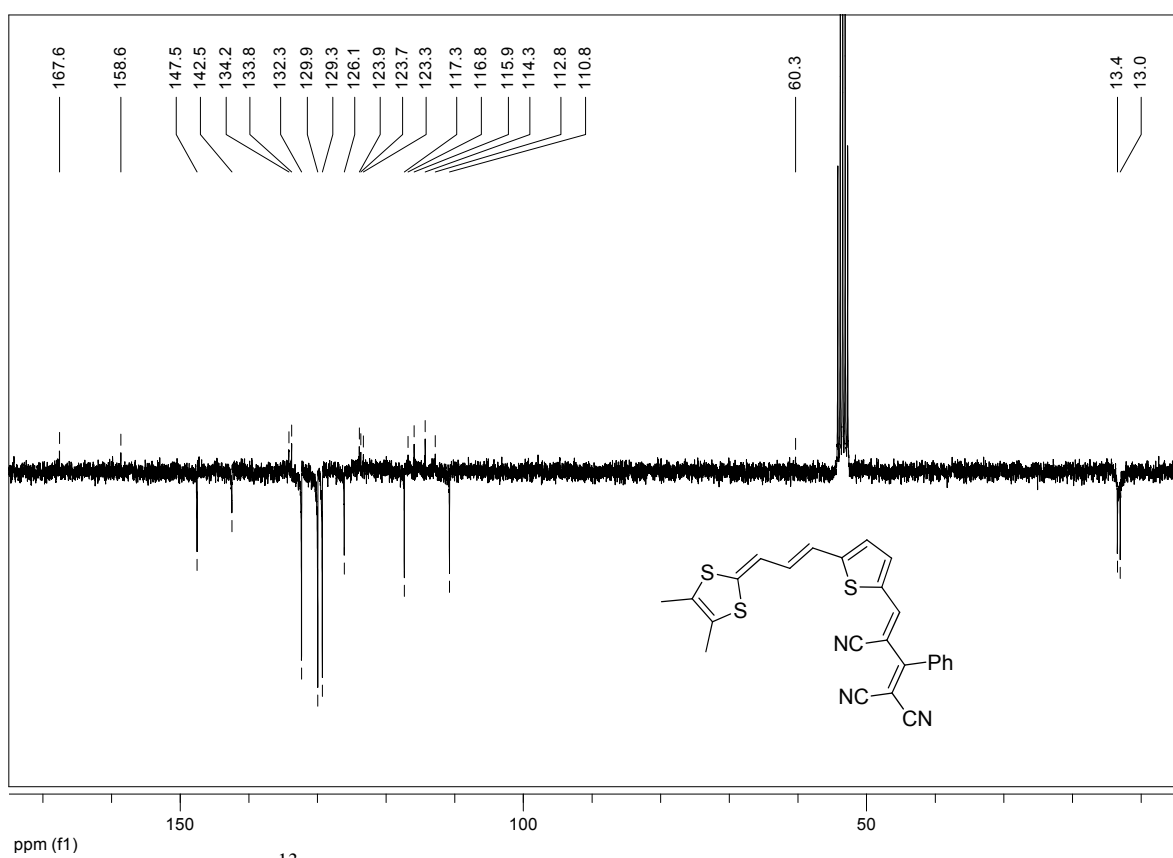

**Figure S-10:** <sup>13</sup>C NMR (APT) spectrum of compound **9b** (75 MHz, CD<sub>2</sub>Cl<sub>2</sub>).

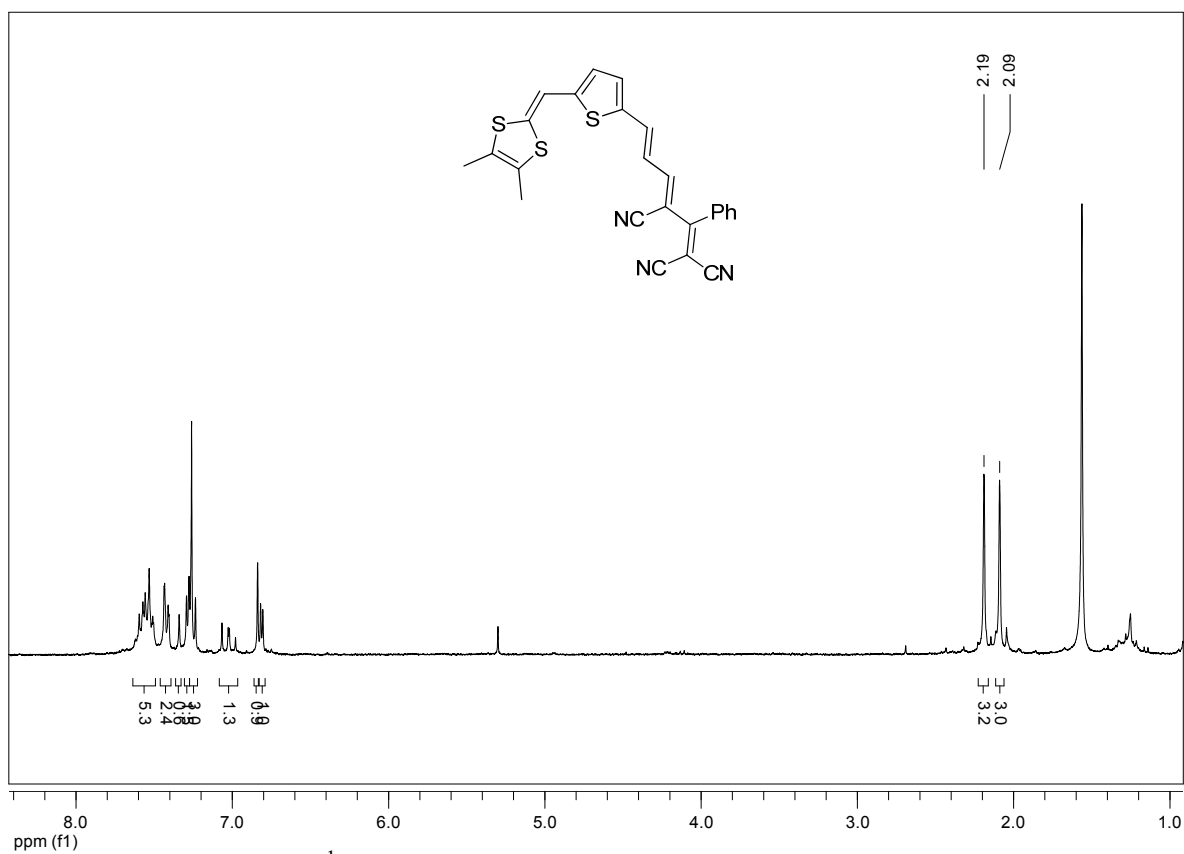

**Figure S-11:**  $^1\text{H NMR}$  spectrum of compound **9c** (300 MHz,  $\text{CDCl}_3$ ).

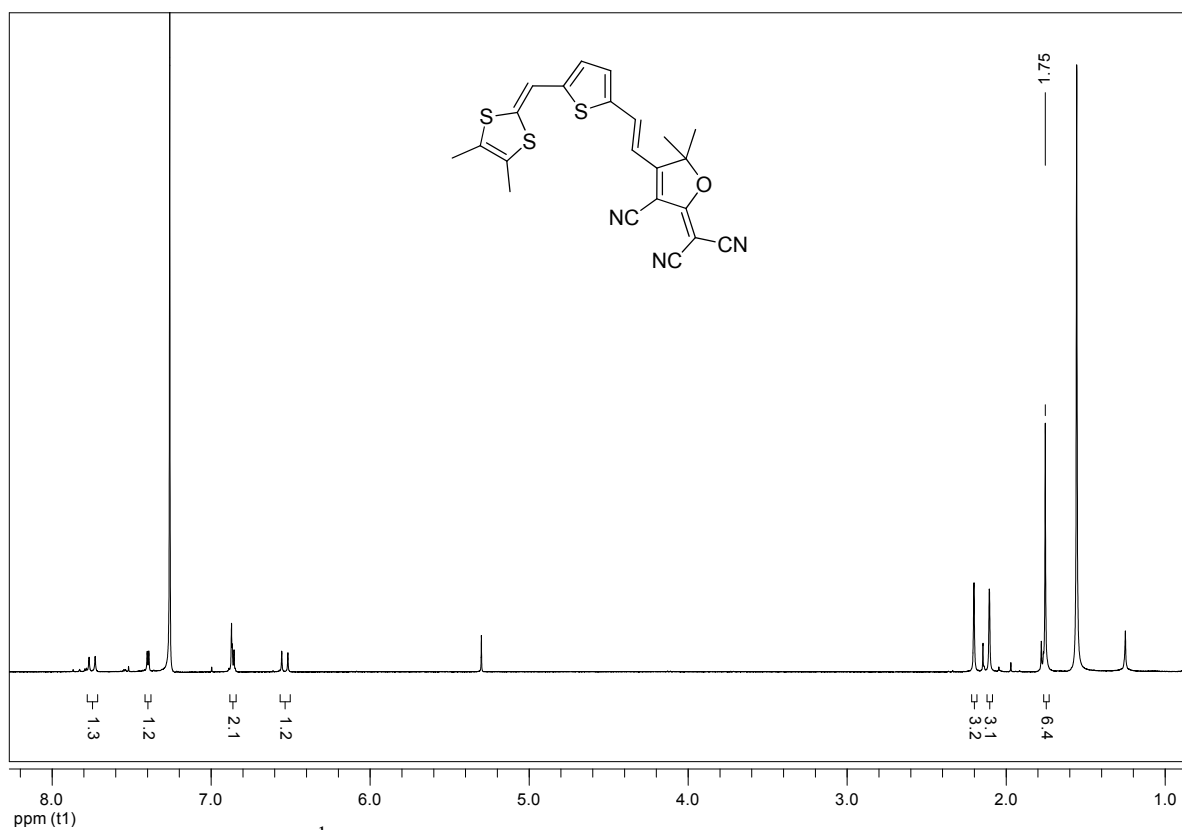

**Figure S-12:**  $^1\text{H NMR}$  spectrum of compound **10a** (400 MHz,  $\text{CDCl}_3$ ).

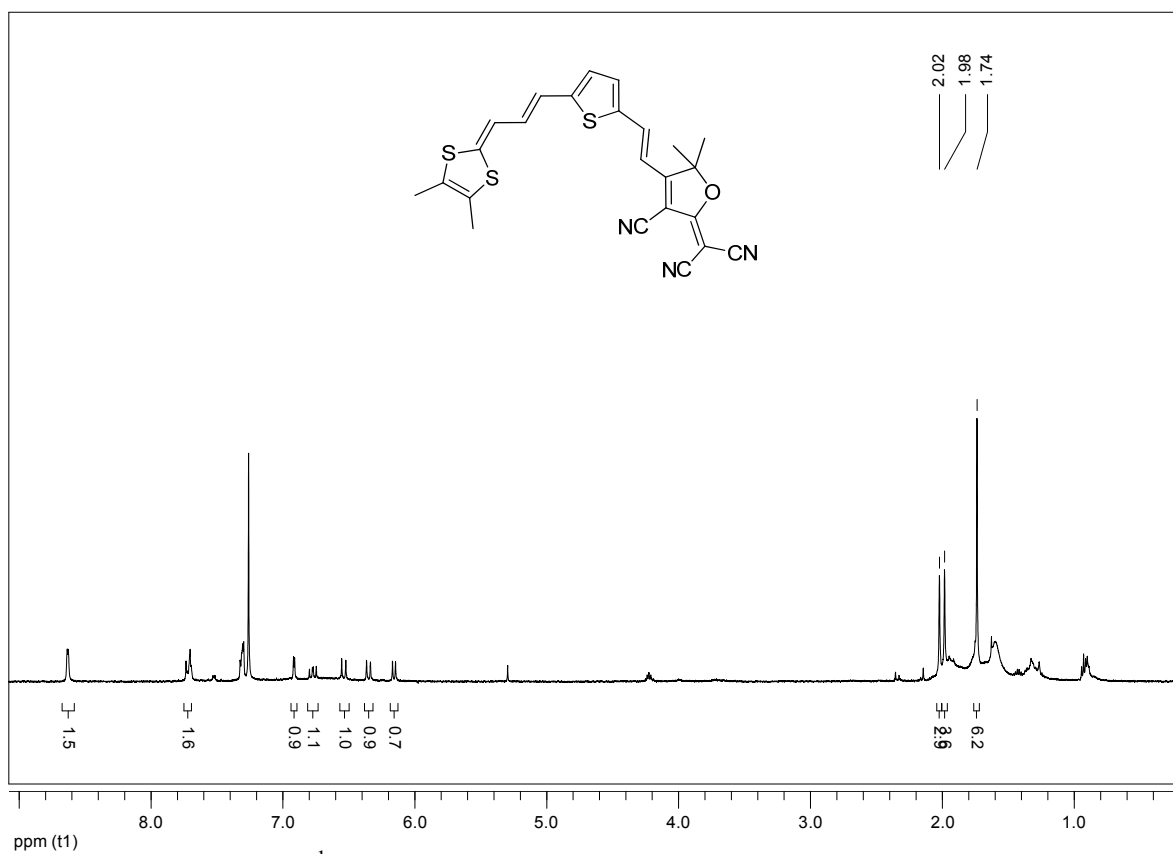

**Figure S-13:** <sup>1</sup>H NMR spectrum of compound **10b** (500 MHz, CDCl<sub>3</sub>).

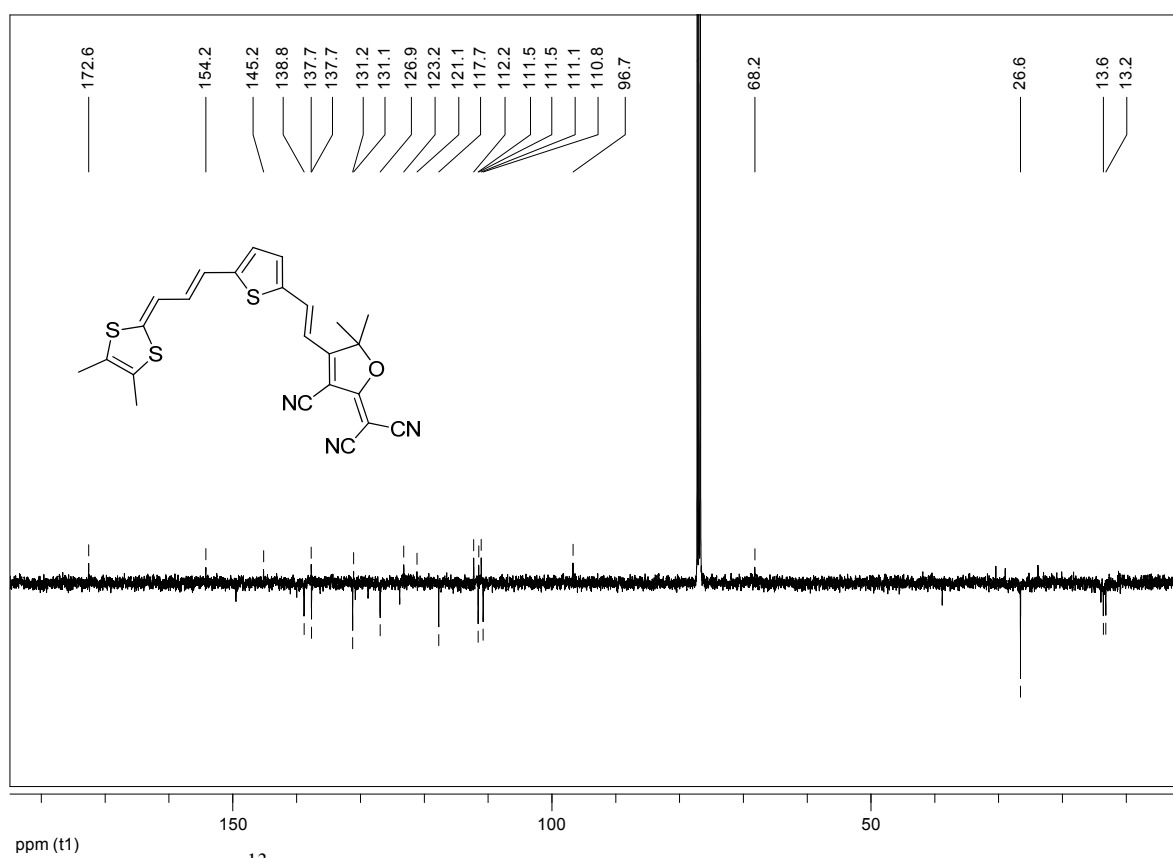

**Figure S-14:** <sup>13</sup>C NMR (APT) spectrum of compound **10b** (125.77 MHz, CDCl<sub>3</sub>).



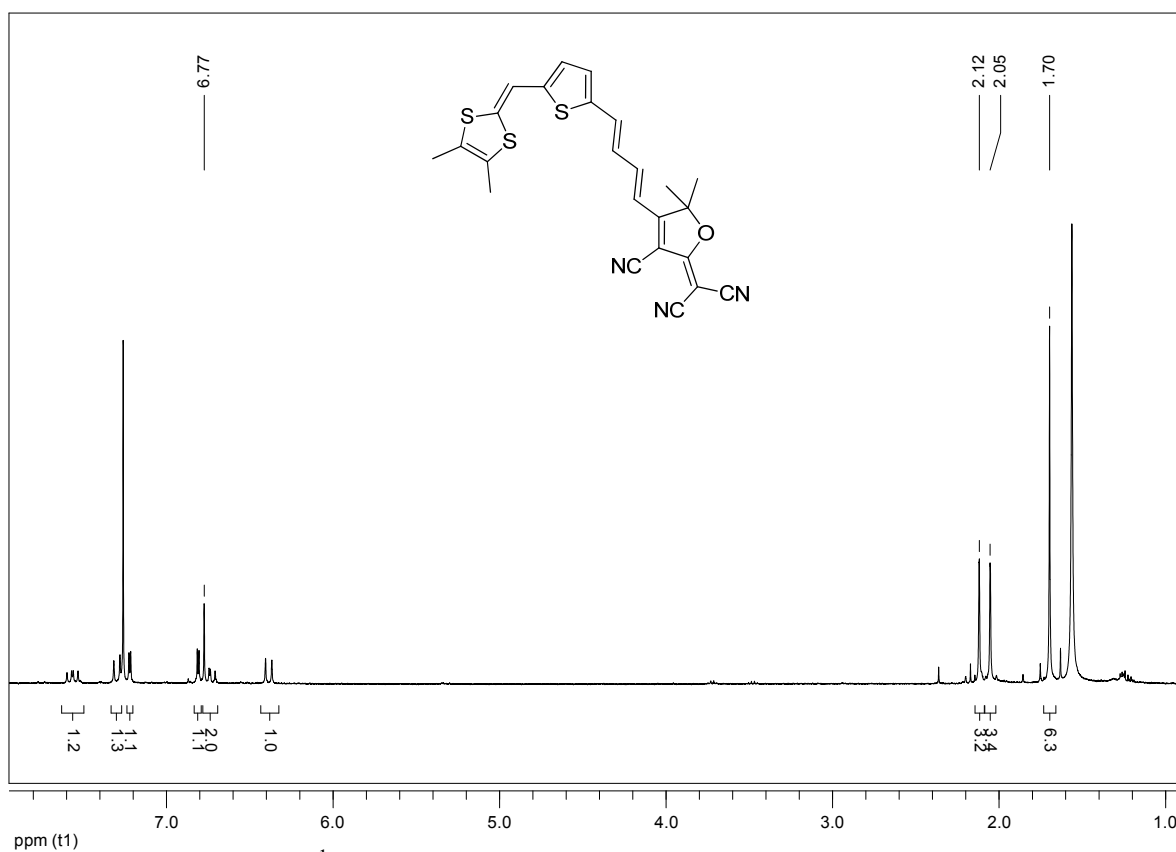

Figure S-15: <sup>1</sup>H NMR spectrum of compound **10c** (400 MHz, CDCl<sub>3</sub>).

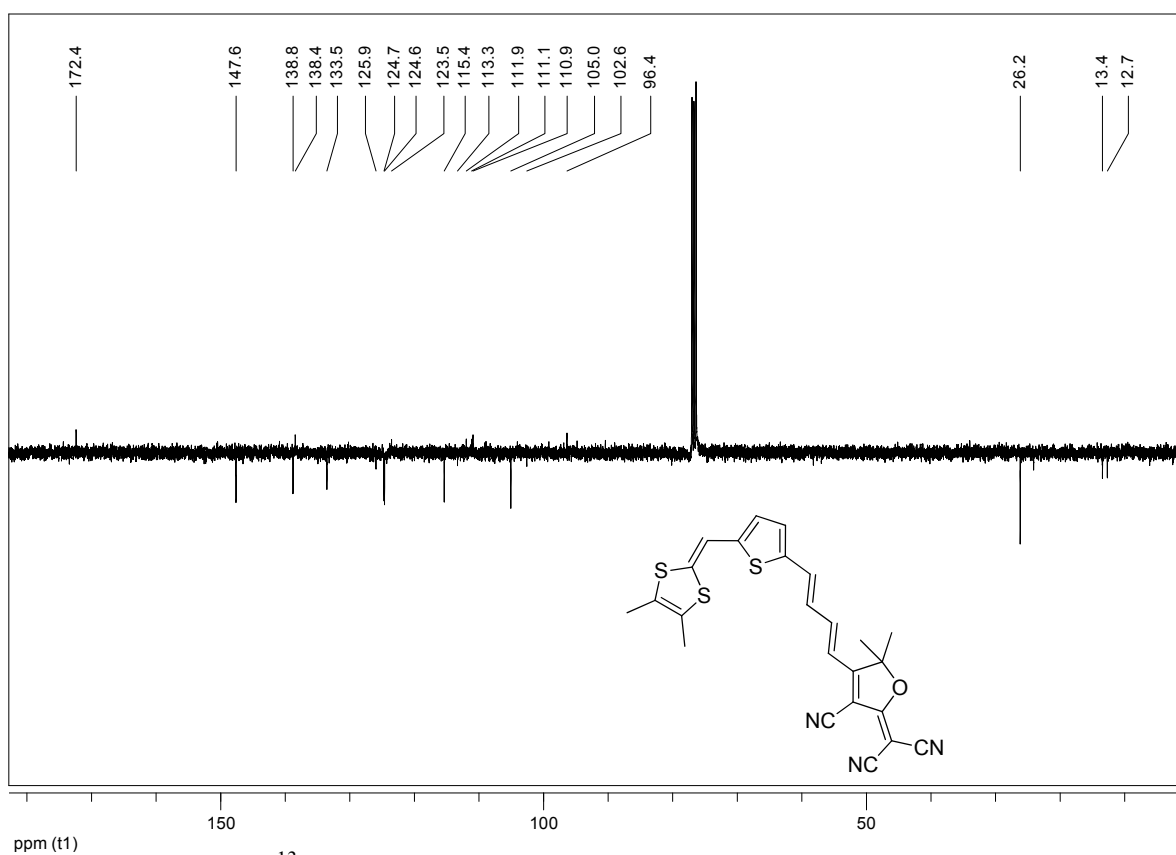

Figure S-16: <sup>13</sup>C NMR (APT) spectrum of compound **10c** (75 MHz, CDCl<sub>3</sub>).

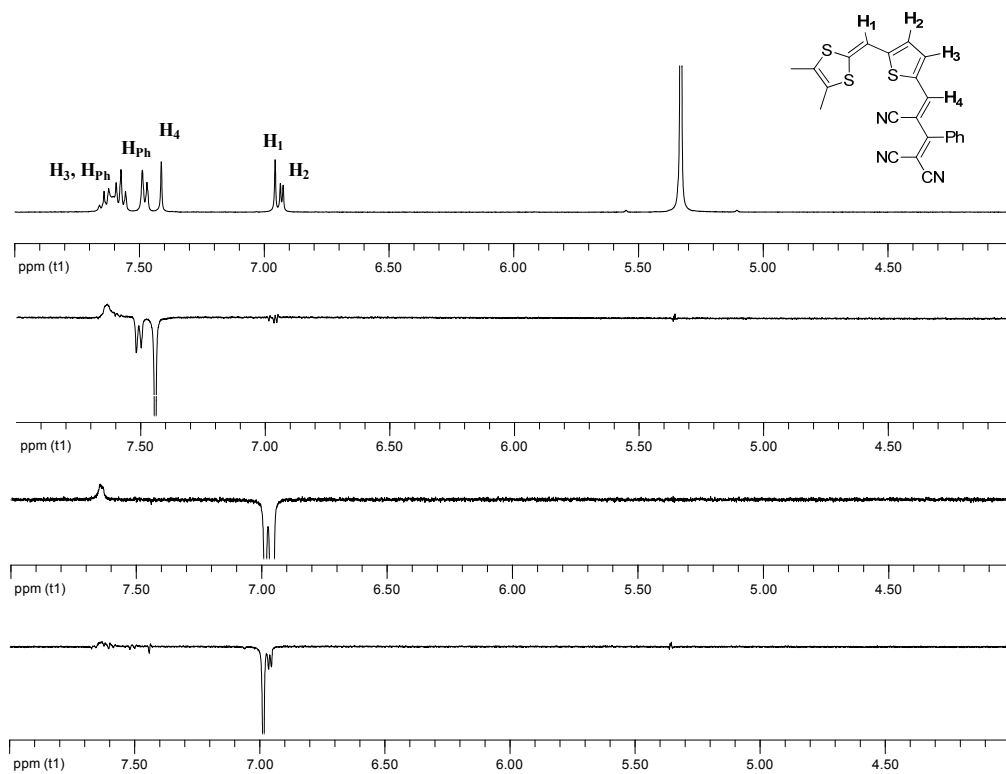

**Figure S-17:** nOe experiment of compound **9a**.

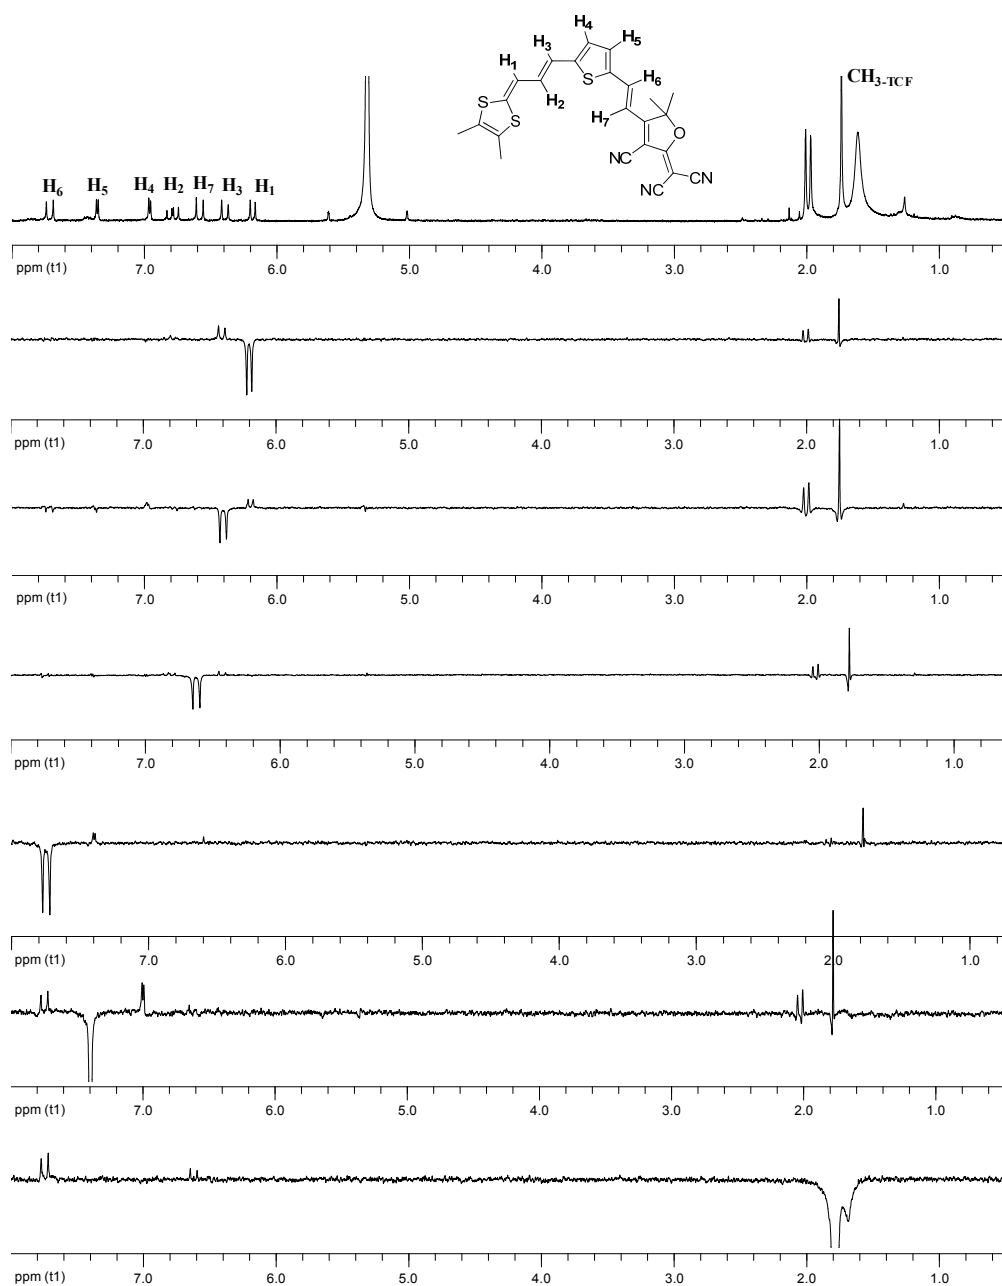

**Figure S-18:** nOe experiment of compound **10b** (300 MHz, CD<sub>2</sub>Cl<sub>2</sub>).

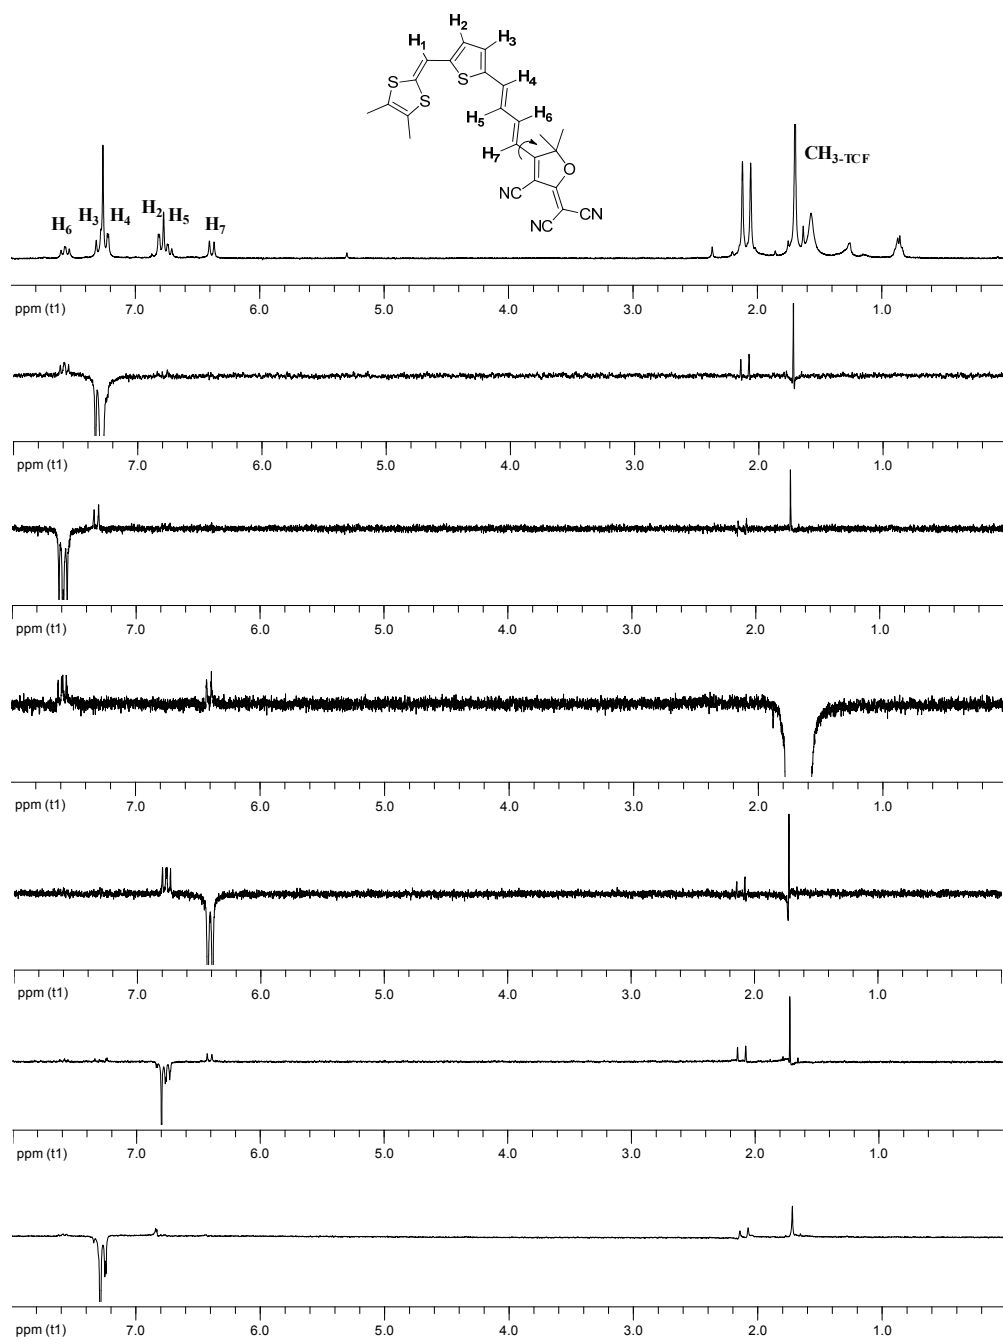

**Figure S-19:** nOe experiment of compound **10c** (400 MHz, CDCl<sub>3</sub>).

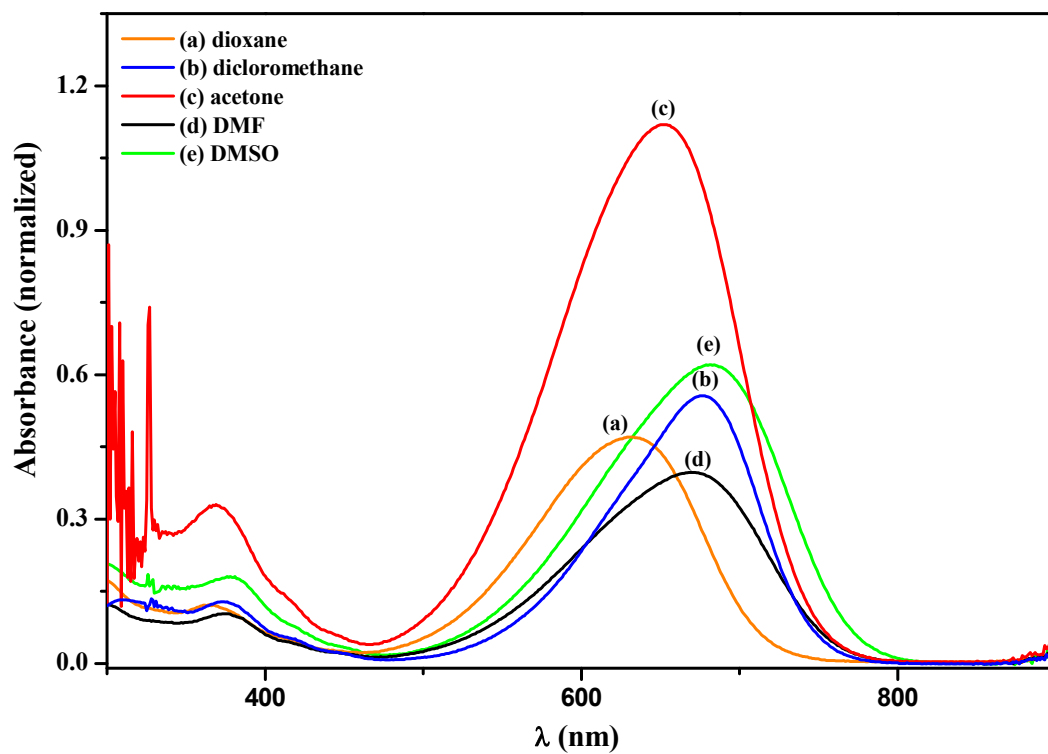

Figure S-20: Normalized UV-vis absorption of compound **9a** ( $10^{-5}$  M).

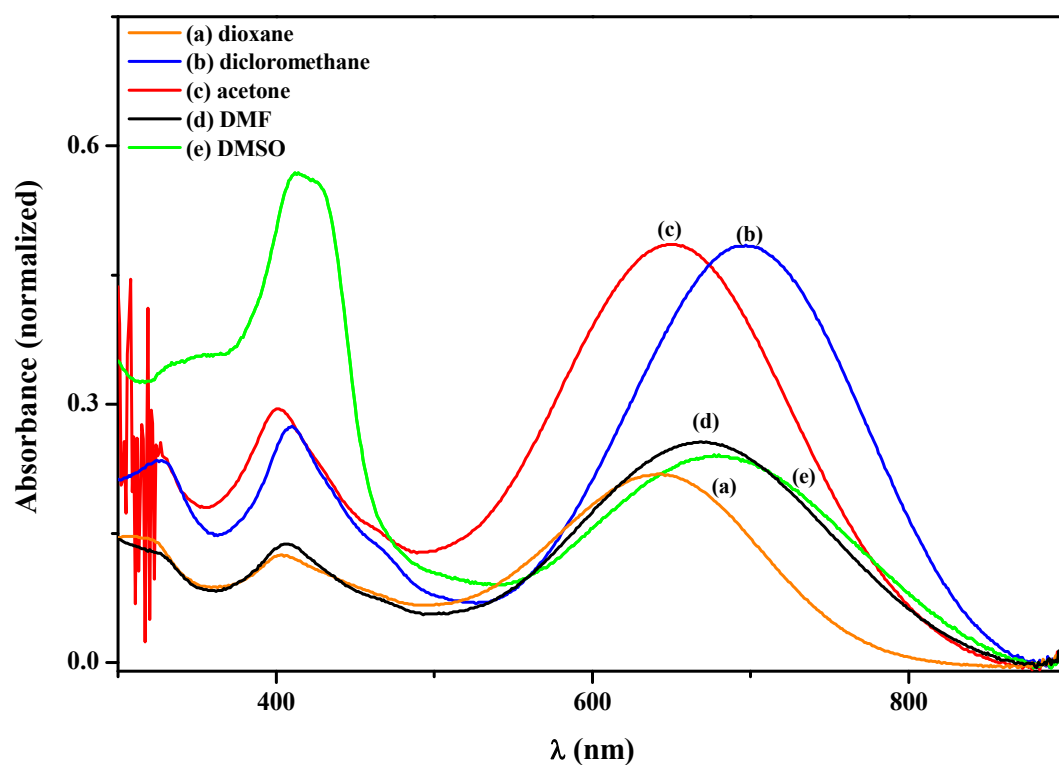

Figure S-21: Normalized UV-vis absorption of compound **9b** ( $10^{-5}$  M).

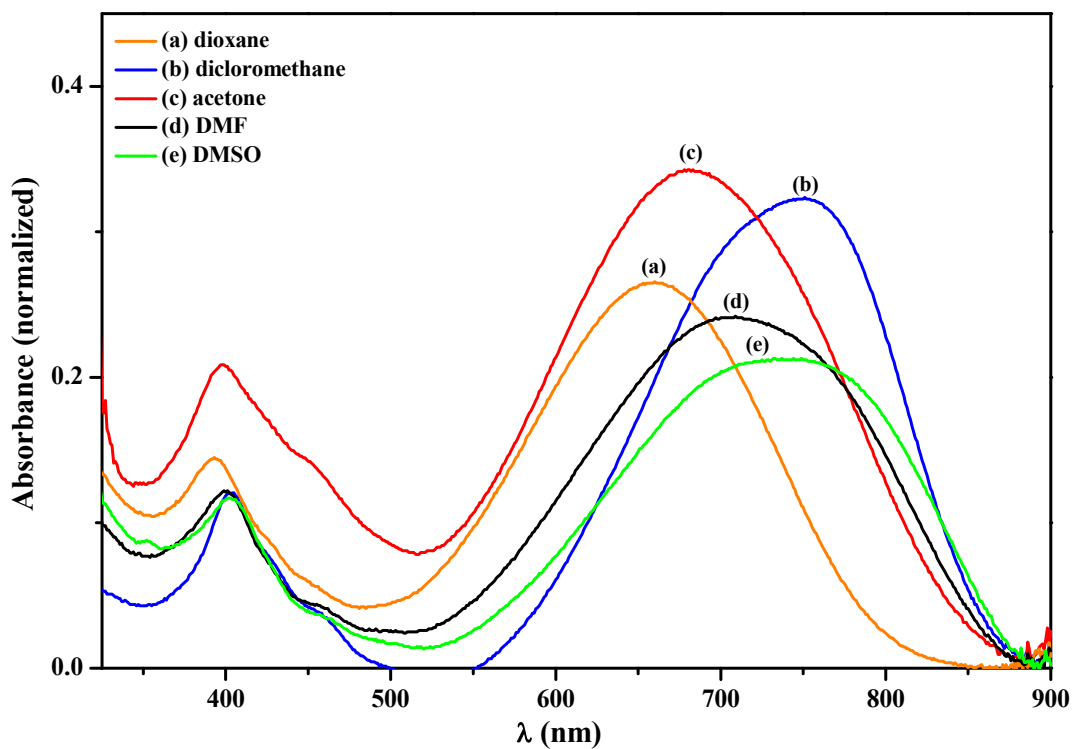

Figure S-22: Normalized UV-vis absorption of compound **9c** ( $10^{-5}$  M).

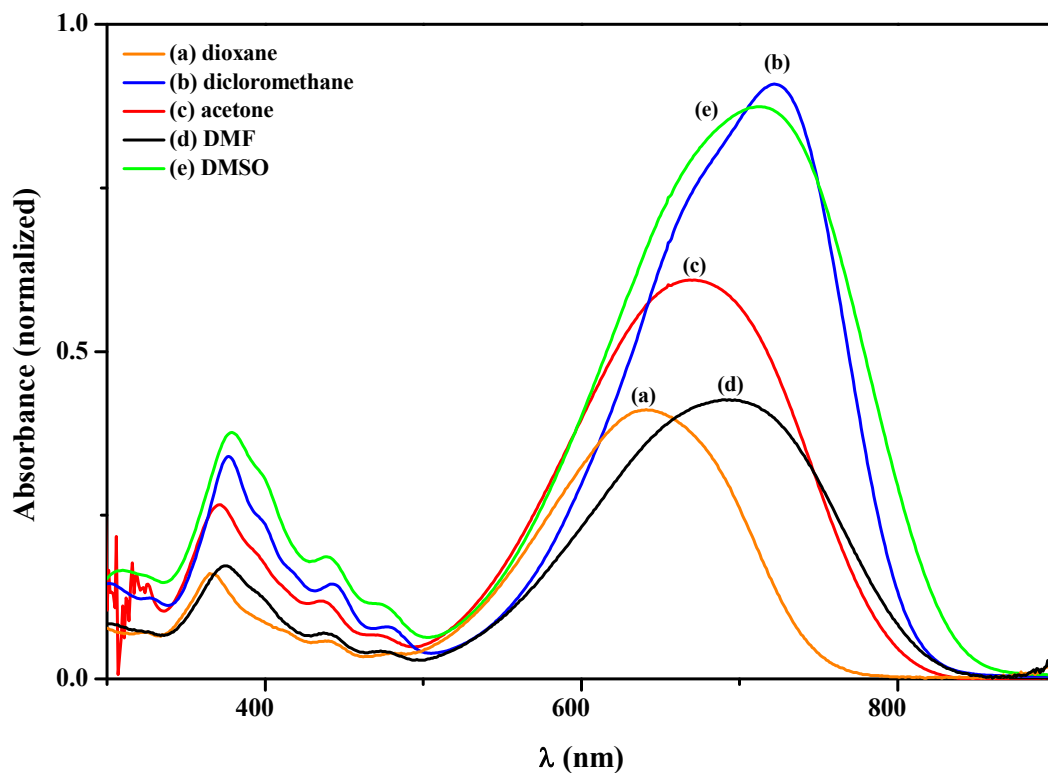

Figure S-23: Normalized UV-vis absorption of compound **10a** ( $10^{-5}$  M).

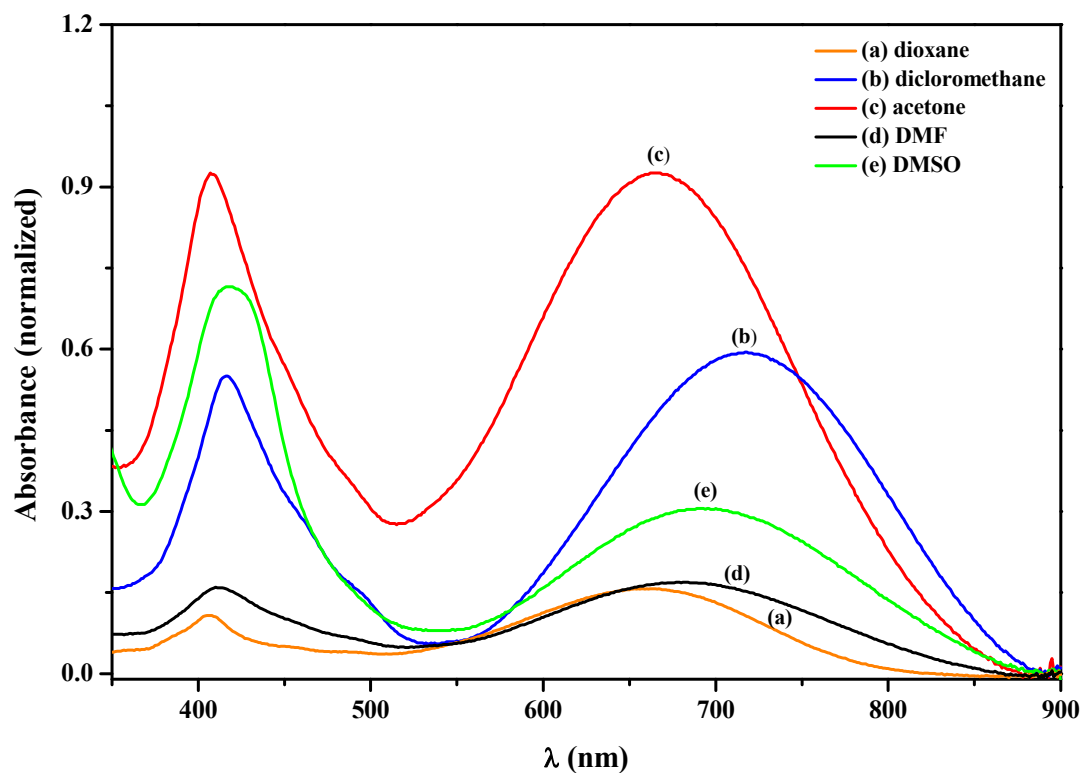

Figure S-24: Normalized UV-vis absorption of compound **10b** ( $10^{-5}$  M).

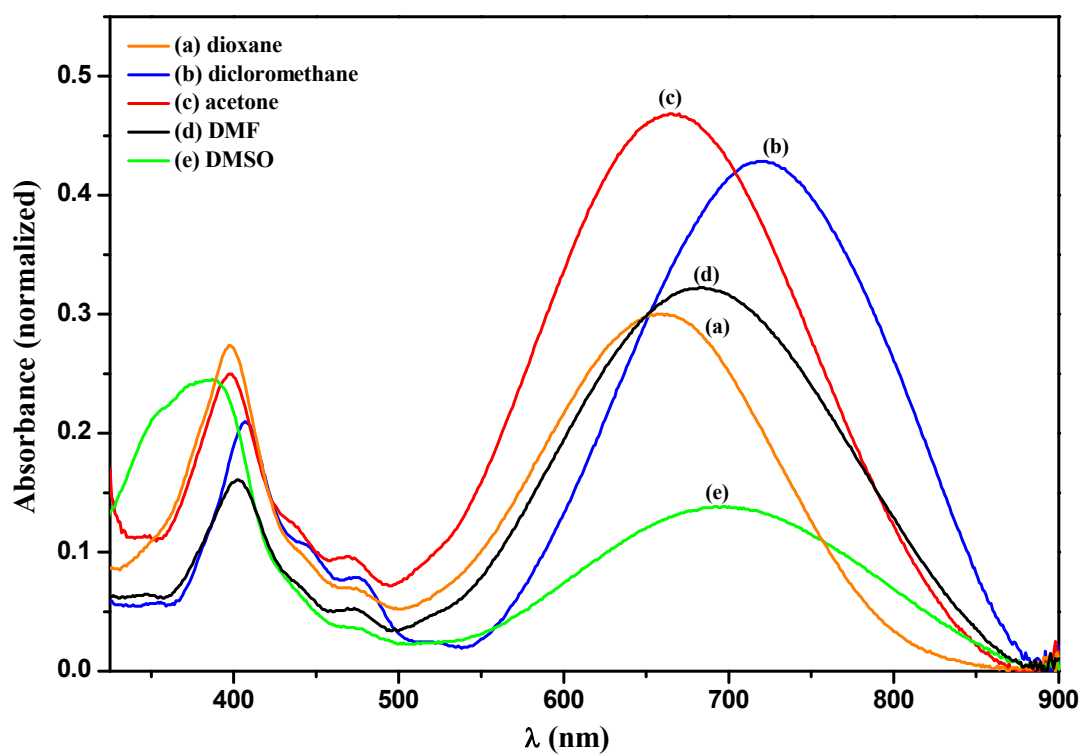

Figure S-25: Normalized UV-vis absorption of compound **10c** ( $10^{-5}$  M).

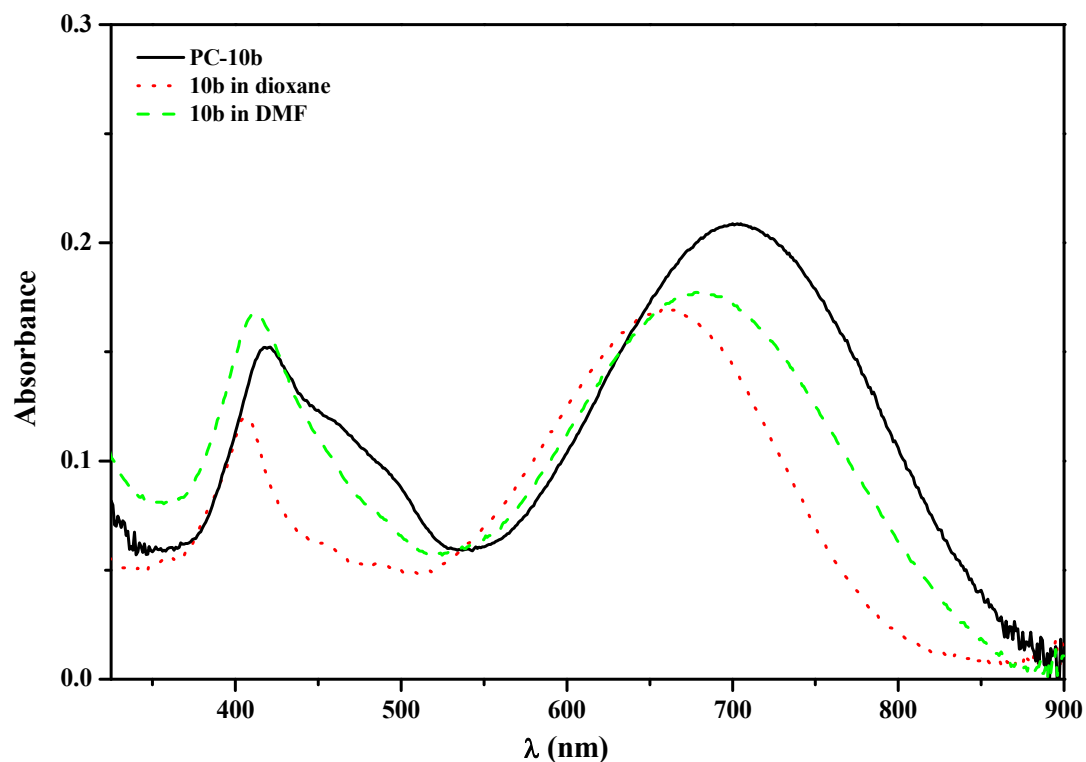

**Figure S-26:** UV-vis absorption of compound **10b** in dioxane and DMF solutions ( $10^{-5}$  M) and of a thin film of polycarbonate with the same compound embedded in.

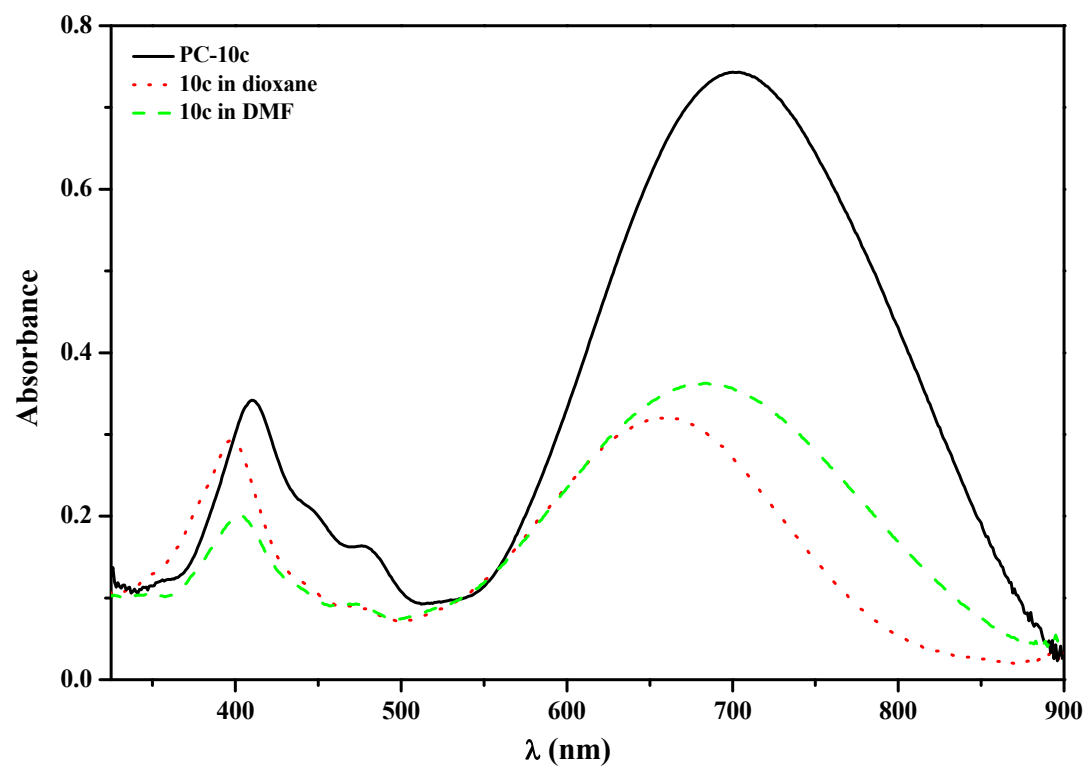

**Figure S-27:** UV-vis absorption of compound **10c** in dioxane and DMF solutions ( $10^{-5}$  M) and of a thin film of polycarbonate with the same compound embedded in.



## Computational Procedures.

All theoretical calculations were performed by using the Gaussian 09<sup>7</sup> program. The gas phase molecular geometries were optimized using the B3P86<sup>8</sup> functional and the 6-31G\*<sup>9</sup> basis set. The same model chemistry (B3P86/6-31G\*) was used for TD-DFT calculations and the excited state dipole moments were calculated by using the CI density. Molecular hyperpolarizabilities were calculated by the Coupled Perturbed Hartree Fock method (CPHF) using the HF/6-31G\* model. The default G09 parameters were used in every calculation.

Calculations in DMF solution were performed using a Polarizable Continuum Model (PCM), TD-DFT calculations used the equilibrium PCM solvation (EqSolv) and the 6-311+G(2d,p) basis set on geometries optimized using PCM, the same functional and the 6-31G\* basis set. CIS calculations used the 6-311+G(2d,p) basis set on PCM-HF/6-31G\* geometries.

## Cartesian coordinates and energies of optimized geometries used in theoretical calculations (gas phase, B3P86/6-31G\*)

### 9a

Standard orientation:

| Center Number | Atomic Number | Atomic Type | Coordinates (Angstroms) |           |           |
|---------------|---------------|-------------|-------------------------|-----------|-----------|
|               |               |             | X                       | Y         | Z         |
| 1             | 6             | 0           | -3.384222               | -1.913537 | -0.496821 |
| 2             | 1             | 0           | -3.815936               | -2.882273 | -0.738836 |
| 3             | 6             | 0           | -1.964920               | -1.873745 | -0.545018 |
| 4             | 6             | 0           | -1.149644               | -2.965020 | -0.871606 |
| 5             | 16            | 0           | -0.999980               | -0.467478 | -0.201002 |
| 6             | 6             | 0           | 0.204700                | -2.666954 | -0.840029 |
| 7             | 1             | 0           | -1.558286               | -3.938039 | -1.120113 |
| 8             | 6             | 0           | 0.492061                | -1.342551 | -0.490268 |
| 9             | 1             | 0           | 0.991527                | -3.380270 | -1.063033 |
| 10            | 6             | 0           | 1.800095                | -0.827597 | -0.398755 |
| 11            | 6             | 0           | 2.262874                | 0.440628  | -0.095198 |
| 12            | 1             | 0           | 2.569031                | -1.563424 | -0.622973 |
| 13            | 6             | 0           | 3.690911                | 0.718608  | -0.058143 |
| 14            | 6             | 0           | 4.604386                | -0.403771 | 0.256791  |
| 15            | 6             | 0           | 4.366454                | -1.207621 | 1.381710  |
| 16            | 6             | 0           | 5.715607                | -0.677240 | -0.551017 |

|    |    |   |           |           |           |
|----|----|---|-----------|-----------|-----------|
| 17 | 6  | 0 | 5.230272  | -2.248808 | 1.698124  |
| 18 | 1  | 0 | 3.511022  | -0.996294 | 2.016421  |
| 19 | 6  | 0 | 6.569121  | -1.729762 | -0.239511 |
| 20 | 1  | 0 | 5.900757  | -0.069815 | -1.431318 |
| 21 | 6  | 0 | 6.331571  | -2.514188 | 0.886438  |
| 22 | 1  | 0 | 5.045231  | -2.852059 | 2.582086  |
| 23 | 1  | 0 | 7.422959  | -1.934790 | -0.878220 |
| 24 | 1  | 0 | 7.004075  | -3.331130 | 1.131790  |
| 25 | 6  | 0 | 4.215531  | 1.974842  | -0.290857 |
| 26 | 6  | 0 | 5.592563  | 2.275115  | -0.062981 |
| 27 | 7  | 0 | 6.703540  | 2.570905  | 0.119601  |
| 28 | 6  | 0 | 3.459749  | 3.067222  | -0.810440 |
| 29 | 7  | 0 | 2.904168  | 3.974923  | -1.281538 |
| 30 | 6  | 0 | 1.333223  | 1.470778  | 0.227905  |
| 31 | 7  | 0 | 0.543252  | 2.264793  | 0.548098  |
| 32 | 6  | 0 | -4.265066 | -0.912919 | -0.190304 |
| 33 | 16 | 0 | -3.848462 | 0.730434  | 0.230749  |
| 34 | 6  | 0 | -6.485754 | 0.422897  | 0.265874  |
| 35 | 6  | 0 | -5.495780 | 1.314996  | 0.461057  |
| 36 | 16 | 0 | -5.993224 | -1.202554 | -0.190940 |
| 37 | 6  | 0 | -7.960565 | 0.644286  | 0.390536  |
| 38 | 1  | 0 | -8.180643 | 1.674795  | 0.674896  |
| 39 | 1  | 0 | -8.472066 | 0.440636  | -0.557035 |
| 40 | 1  | 0 | -8.396341 | -0.014476 | 1.150282  |
| 41 | 6  | 0 | -5.612243 | 2.754773  | 0.850984  |
| 42 | 1  | 0 | -6.656436 | 3.045498  | 0.980359  |
| 43 | 1  | 0 | -5.088171 | 2.951686  | 1.792944  |
| 44 | 1  | 0 | -5.172318 | 3.406592  | 0.087885  |

E(RB3P86) = -2248.23248110 A.U.

9b

Standard orientation:

| Center Number | Atomic Number | Atomic Type | Coordinates (Angstroms) |           |           |
|---------------|---------------|-------------|-------------------------|-----------|-----------|
|               |               |             | X                       | Y         | Z         |
| 1             | 6             | 0           | -4.581016               | -1.655136 | -0.278662 |
| 2             | 1             | 0           | -4.955401               | -2.661395 | -0.456502 |
| 3             | 6             | 0           | -0.850784               | -2.303760 | -0.545354 |
| 4             | 6             | 0           | 0.076656                | -3.316353 | -0.802166 |
| 5             | 16            | 0           | -0.046812               | -0.791565 | -0.239277 |
| 6             | 6             | 0           | 1.395346                | -2.878175 | -0.754192 |
| 7             | 1             | 0           | -0.223045               | -4.336001 | -1.017055 |
| 8             | 6             | 0           | 1.533645                | -1.518751 | -0.457728 |
| 9             | 1             | 0           | 2.256949                | -3.514567 | -0.928380 |
| 10            | 6             | 0           | 2.783740                | -0.872977 | -0.363327 |
| 11            | 6             | 0           | 3.110301                | 0.445468  | -0.103397 |
| 12            | 1             | 0           | 3.626695                | -1.536185 | -0.542668 |
| 13            | 6             | 0           | 4.502511                | 0.868226  | -0.052207 |
| 14            | 6             | 0           | 5.519558                | -0.142093 | 0.319055  |
| 15            | 6             | 0           | 5.343232                | -0.930664 | 1.465981  |
| 16            | 6             | 0           | 6.671211                | -0.320976 | -0.458199 |
| 17            | 6             | 0           | 6.306339                | -1.862055 | 1.834224  |
| 18            | 1             | 0           | 4.456335                | -0.791750 | 2.077035  |
| 19            | 6             | 0           | 7.625397                | -1.264462 | -0.094477 |
| 20            | 1             | 0           | 6.810111                | 0.273659  | -1.355540 |
| 21            | 6             | 0           | 7.448010                | -2.032807 | 1.053416  |
| 22            | 1             | 0           | 6.166946                | -2.453096 | 2.734644  |
| 23            | 1             | 0           | 8.510343                | -1.397056 | -0.709536 |
| 24            | 1             | 0           | 8.198572                | -2.763874 | 1.339885  |
| 25            | 6             | 0           | 4.901363                | 2.162258  | -0.324101 |
| 26            | 6             | 0           | 6.235379                | 2.610591  | -0.083448 |
| 27            | 7             | 0           | 7.306094                | 3.026263  | 0.105884  |
| 28            | 6             | 0           | 4.051270                | 3.152183  | -0.900249 |
| 29            | 7             | 0           | 3.420294                | 3.982366  | -1.417071 |
| 30            | 6             | 0           | 2.076556                | 1.389629  | 0.162061  |
| 31            | 7             | 0           | 1.206249                | 2.113972  | 0.435246  |

S18

|    |    |   |           |           |           |
|----|----|---|-----------|-----------|-----------|
| 32 | 6  | 0 | -5.503557 | -0.670398 | -0.057373 |
| 33 | 16 | 0 | -5.119077 | 1.013252  | 0.240448  |
| 34 | 6  | 0 | -7.750697 | 0.658699  | 0.281382  |
| 35 | 6  | 0 | -6.779273 | 1.581003  | 0.414794  |
| 36 | 16 | 0 | -7.224747 | -0.990514 | -0.047959 |
| 37 | 6  | 0 | -9.230224 | 0.859327  | 0.378681  |
| 38 | 1  | 0 | -9.473803 | 1.903528  | 0.582907  |
| 39 | 1  | 0 | -9.729848 | 0.574001  | -0.554186 |
| 40 | 1  | 0 | -9.659421 | 0.250788  | 1.182918  |
| 41 | 6  | 0 | -6.929669 | 3.043393  | 0.692953  |
| 42 | 1  | 0 | -7.981042 | 3.322040  | 0.785078  |
| 43 | 1  | 0 | -6.424453 | 3.321748  | 1.624804  |
| 44 | 1  | 0 | -6.491357 | 3.644772  | -0.111589 |
| 45 | 6  | 0 | -3.176253 | -1.461689 | -0.293260 |
| 46 | 6  | 0 | -2.267379 | -2.453558 | -0.525587 |
| 47 | 1  | 0 | -2.805369 | -0.452963 | -0.106122 |
| 48 | 1  | 0 | -2.630434 | -3.462152 | -0.718400 |

-----  
E(RB3P86) = -2325.89144161 A.U.

## 9c

Standard orientation:

| Center<br>Number | Atomic<br>Number | Atomic<br>Type | Coordinates (Angstroms) |           |           |
|------------------|------------------|----------------|-------------------------|-----------|-----------|
|                  |                  |                | X                       | Y         | Z         |
| 1                | 6                | 0              | -4.685492               | -1.878313 | -0.341407 |
| 2                | 1                | 0              | -5.323260               | -2.745673 | -0.497921 |
| 3                | 6                | 0              | -3.293448               | -2.154413 | -0.426722 |
| 4                | 6                | 0              | -2.743450               | -3.412498 | -0.688536 |
| 5                | 16               | 0              | -2.025759               | -0.975709 | -0.221627 |
| 6                | 6                | 0              | -1.351106               | -3.417805 | -0.721328 |
| 7                | 1                | 0              | -3.362382               | -4.288217 | -0.848985 |
| 8                | 6                | 0              | -0.775623               | -2.170628 | -0.487018 |
| 9                | 1                | 0              | -0.750454               | -4.301322 | -0.911129 |
| 10               | 6                | 0              | 2.571076                | -0.454562 | -0.225139 |
| 11               | 6                | 0              | 3.229498                | 0.747988  | -0.028676 |
| 12               | 1                | 0              | 3.190318                | -1.329018 | -0.410868 |
| 13               | 6                | 0              | 4.677862                | 0.836657  | -0.039274 |
| 14               | 6                | 0              | 5.446004                | -0.388830 | 0.282013  |
| 15               | 6                | 0              | 5.158311                | -1.116026 | 1.446322  |
| 16               | 6                | 0              | 6.470677                | -0.835116 | -0.561995 |
| 17               | 6                | 0              | 5.890672                | -2.253389 | 1.764484  |
| 18               | 1                | 0              | 4.371189                | -0.770656 | 2.110104  |
| 19               | 6                | 0              | 7.191384                | -1.981854 | -0.247824 |
| 20               | 1                | 0              | 6.692609                | -0.287013 | -1.472298 |
| 21               | 6                | 0              | 6.906546                | -2.690507 | 0.916673  |
| 22               | 1                | 0              | 5.670387                | -2.797008 | 2.678578  |
| 23               | 1                | 0              | 7.978847                | -2.320002 | -0.914627 |
| 24               | 1                | 0              | 7.476073                | -3.581696 | 1.164271  |
| 25               | 6                | 0              | 5.359438                | 2.003703  | -0.326952 |
| 26               | 6                | 0              | 6.772178                | 2.115897  | -0.155263 |
| 27               | 7                | 0              | 7.919783                | 2.259788  | -0.022812 |
| 28               | 6                | 0              | 4.744294                | 3.178550  | -0.851691 |
| 29               | 7                | 0              | 4.310122                | 4.148136  | -1.327098 |
| 30               | 6                | 0              | 2.426698                | 1.901633  | 0.224638  |
| 31               | 7                | 0              | 1.699334                | 2.773315  | 0.482179  |
| 32               | 6                | 0              | -5.319785               | -0.693623 | -0.095449 |
| 33               | 16               | 0              | -4.547020               | 0.849410  | 0.189421  |
| 34               | 6                | 0              | -7.186054               | 1.122063  | 0.296249  |
| 35               | 6                | 0              | -6.022768               | 1.791790  | 0.401839  |
| 36               | 16               | 0              | -7.070437               | -0.601051 | -0.039084 |
| 37               | 6                | 0              | -8.573963               | 1.665676  | 0.429691  |
| 38               | 1                | 0              | -8.558335               | 2.736407  | 0.640565  |
| 39               | 1                | 0              | -9.148409               | 1.512494  | -0.490959 |
| 40               | 1                | 0              | -9.115361               | 1.170775  | 1.243947  |
| 41               | 6                | 0              | -5.815463               | 3.247437  | 0.678612  |
| 42               | 1                | 0              | -6.768667               | 3.767492  | 0.790022  |

|    |   |   |           |           |           |
|----|---|---|-----------|-----------|-----------|
| 43 | 1 | 0 | -5.240634 | 3.396229  | 1.599691  |
| 44 | 1 | 0 | -5.262579 | 3.729068  | -0.135759 |
| 45 | 6 | 0 | 0.604426  | -1.865045 | -0.458103 |
| 46 | 6 | 0 | 1.173318  | -0.638530 | -0.226145 |
| 47 | 1 | 0 | 1.265157  | -2.712304 | -0.643429 |
| 48 | 1 | 0 | 0.540905  | 0.227820  | -0.040417 |

-----  
E (RB3P86) = -2325.89372412 A.U.

## 10a

Standard orientation:

| Center<br>Number | Atomic<br>Number | Atomic<br>Type | Coordinates (Angstroms) |           |           |
|------------------|------------------|----------------|-------------------------|-----------|-----------|
|                  |                  |                | X                       | Y         | Z         |
| 1                | 6                | 0              | 4.208412                | -1.774496 | -0.000173 |
| 2                | 1                | 0              | 4.879305                | -2.630913 | -0.000172 |
| 3                | 6                | 0              | 2.828696                | -2.115139 | -0.000088 |
| 4                | 6                | 0              | 2.328364                | -3.420340 | -0.000004 |
| 5                | 16               | 0              | 1.515403                | -0.968104 | -0.000077 |
| 6                | 6                | 0              | 0.937304                | -3.484973 | 0.000072  |
| 7                | 1                | 0              | 2.981013                | -4.286142 | 0.000002  |
| 8                | 6                | 0              | 0.313401                | -2.239292 | 0.000048  |
| 9                | 1                | 0              | 0.372394                | -4.411573 | 0.000144  |
| 10               | 6                | 0              | -1.079946               | -1.991886 | 0.000110  |
| 11               | 6                | 0              | -1.686033               | -0.763118 | 0.000084  |
| 12               | 1                | 0              | -1.690331               | -2.892214 | 0.000195  |
| 13               | 1                | 0              | -1.056905               | 0.126022  | 0.000021  |
| 14               | 6                | 0              | -3.077571               | -0.510070 | 0.000154  |
| 15               | 6                | 0              | -4.205261               | -1.521859 | 0.000229  |
| 16               | 6                | 0              | -3.649450               | 0.749388  | 0.000175  |
| 17               | 6                | 0              | -5.080960               | 0.606963  | 0.000295  |
| 18               | 6                | 0              | -6.087042               | 1.547156  | 0.000343  |
| 19               | 6                | 0              | -7.443581               | 1.122320  | 0.000493  |
| 20               | 7                | 0              | -8.555732               | 0.778439  | 0.000616  |
| 21               | 6                | 0              | -5.823214               | 2.941832  | 0.000252  |
| 22               | 7                | 0              | -5.648124               | 4.092907  | 0.000179  |
| 23               | 6                | 0              | -2.901429               | 1.950217  | 0.000103  |
| 24               | 7                | 0              | -2.195769               | 2.875916  | 0.000089  |
| 25               | 6                | 0              | -4.269857               | -2.361218 | -1.271891 |
| 26               | 1                | 0              | -3.421486               | -3.047278 | -1.335319 |
| 27               | 1                | 0              | -5.194040               | -2.945725 | -1.273120 |
| 28               | 1                | 0              | -4.261225               | -1.717123 | -2.155039 |
| 29               | 6                | 0              | -4.269544               | -2.361343 | 1.272280  |
| 30               | 1                | 0              | -5.193707               | -2.945879 | 1.273658  |
| 31               | 1                | 0              | -3.421133               | -3.047379 | 1.335443  |
| 32               | 1                | 0              | -4.260732               | -1.717335 | 2.155490  |
| 33               | 6                | 0              | 4.796919                | -0.541141 | -0.000252 |
| 34               | 16               | 0              | 3.967176                | 0.997865  | -0.000273 |
| 35               | 6                | 0              | 6.594155                | 1.382384  | -0.000416 |
| 36               | 6                | 0              | 5.406677                | 2.017342  | -0.000379 |
| 37               | 16               | 0              | 6.542144                | -0.376021 | -0.000356 |
| 38               | 6                | 0              | 7.961465                | 1.990685  | -0.000496 |
| 39               | 1                | 0              | 7.907461                | 3.080757  | -0.000593 |
| 40               | 1                | 0              | 8.530652                | 1.682393  | 0.883792  |
| 41               | 1                | 0              | 8.530620                | 1.682233  | -0.884750 |
| 42               | 6                | 0              | 5.145775                | 3.490458  | -0.000391 |
| 43               | 1                | 0              | 6.079546                | 4.055727  | -0.000653 |
| 44               | 1                | 0              | 4.570819                | 3.789774  | -0.883942 |
| 45               | 1                | 0              | 4.571252                | 3.789867  | 0.883411  |
| 46               | 8                | 0              | -5.400674               | -0.692389 | 0.000405  |

-----  
E (RB3P86) = -2286.63647841 A.U.

## 10b

Standard orientation:

| Center Number | Atomic Number | Atomic Type | Coordinates (Angstroms) |           |           |
|---------------|---------------|-------------|-------------------------|-----------|-----------|
|               |               |             | X                       | Y         | Z         |
| 1             | 6             | 0           | 5.132006                | -1.435737 | 0.000041  |
| 2             | 1             | 0           | 5.715431                | -2.354355 | 0.000061  |
| 3             | 6             | 0           | 1.629424                | -2.899908 | 0.000090  |
| 4             | 6             | 0           | 0.934763                | -4.108923 | 0.000134  |
| 5             | 16            | 0           | 0.512718                | -1.560396 | 0.000046  |
| 6             | 6             | 0           | -0.452582               | -3.956379 | 0.000137  |
| 7             | 1             | 0           | 1.444202                | -5.066133 | 0.000166  |
| 8             | 6             | 0           | -0.872823               | -2.629242 | 0.000092  |
| 9             | 1             | 0           | -1.155398               | -4.783283 | 0.000170  |
| 10            | 6             | 0           | -2.212855               | -2.171316 | 0.000085  |
| 11            | 6             | 0           | -2.617124               | -0.862468 | 0.000034  |
| 12            | 1             | 0           | -2.955372               | -2.966158 | 0.000121  |
| 13            | 1             | 0           | -1.853558               | -0.085674 | -0.000016 |
| 14            | 6             | 0           | -3.949933               | -0.388260 | 0.000029  |
| 15            | 6             | 0           | -5.227379               | -1.202385 | 0.000095  |
| 16            | 6             | 0           | -4.308268               | 0.947518  | -0.000052 |
| 17            | 6             | 0           | -5.743734               | 1.041215  | -0.000063 |
| 18            | 6             | 0           | -6.582704               | 2.133087  | -0.000142 |
| 19            | 6             | 0           | -7.990388               | 1.935072  | -0.000131 |
| 20            | 7             | 0           | -9.143694               | 1.776919  | -0.000122 |
| 21            | 6             | 0           | -6.095713               | 3.466362  | -0.000237 |
| 22            | 7             | 0           | -5.737020               | 4.574030  | -0.000316 |
| 23            | 6             | 0           | -3.375525               | 2.011270  | -0.000131 |
| 24            | 7             | 0           | -2.530745               | 2.811967  | -0.000194 |
| 25            | 6             | 0           | -5.430181               | -2.019667 | -1.271815 |
| 26            | 1             | 0           | -4.708003               | -2.837385 | -1.336244 |
| 27            | 1             | 0           | -6.438612               | -2.442571 | -1.272341 |
| 28            | 1             | 0           | -5.315336               | -1.386491 | -2.155442 |
| 29            | 6             | 0           | -5.430188               | -2.019463 | 1.272136  |
| 30            | 1             | 0           | -6.438624               | -2.442354 | 1.272733  |
| 31            | 1             | 0           | -4.708023               | -2.837181 | 1.336693  |
| 32            | 1             | 0           | -5.315331               | -1.386149 | 2.155662  |
| 33            | 6             | 0           | 5.819179                | -0.253743 | 0.000015  |
| 34            | 16            | 0           | 5.078486                | 1.334913  | -0.000016 |
| 35            | 6             | 0           | 7.723970                | 1.563970  | -0.000015 |
| 36            | 6             | 0           | 6.575903                | 2.266700  | -0.000027 |
| 37            | 16            | 0           | 7.568715                | -0.191429 | 0.000011  |
| 38            | 6             | 0           | 9.124888                | 2.089275  | -0.000013 |
| 39            | 1             | 0           | 9.137112                | 3.180742  | -0.000066 |
| 40            | 1             | 0           | 9.674888                | 1.747190  | 0.884139  |
| 41            | 1             | 0           | 9.674924                | 1.747103  | -0.884109 |
| 42            | 6             | 0           | 6.404784                | 3.752941  | -0.000038 |
| 43            | 1             | 0           | 7.370330                | 4.262163  | -0.000139 |
| 44            | 1             | 0           | 5.848730                | 4.086022  | -0.883743 |
| 45            | 1             | 0           | 5.848894                | 4.086055  | 0.883758  |
| 46            | 6             | 0           | 3.718479                | -1.552330 | 0.000047  |
| 47            | 6             | 0           | 3.044578                | -2.739277 | 0.000080  |
| 48            | 1             | 0           | 3.138461                | -0.628316 | 0.000026  |
| 49            | 1             | 0           | 3.615507                | -3.666769 | 0.000105  |
| 50            | 8             | 0           | -6.271272               | -0.188267 | 0.000017  |

E(RB3P86) = -2364.29582397 A.U.

## 10c

Standard orientation:

| Center Number | Atomic Number | Atomic Type | Coordinates (Angstroms) |           |           |
|---------------|---------------|-------------|-------------------------|-----------|-----------|
|               |               |             | X                       | Y         | Z         |
| 1             | 6             | 0           | 5.484802                | -1.587410 | -0.000903 |
| 2             | 1             | 0           | 6.261867                | -2.348866 | -0.001013 |
| 3             | 6             | 0           | 4.161142                | -2.108462 | -0.000675 |
| 4             | 6             | 0           | 3.838477                | -3.466674 | -0.000595 |

|    |    |   |           |           |           |
|----|----|---|-----------|-----------|-----------|
| 5  | 16 | 0 | 2.704907  | -1.147758 | -0.000455 |
| 6  | 6  | 0 | 2.466791  | -3.717240 | -0.000368 |
| 7  | 1  | 0 | 4.600368  | -4.238228 | -0.000702 |
| 8  | 6  | 0 | 1.682439  | -2.567493 | -0.000266 |
| 9  | 1  | 0 | 2.030801  | -4.710864 | -0.000275 |
| 10 | 6  | 0 | -1.923374 | -1.410890 | 0.000301  |
| 11 | 6  | 0 | -2.709280 | -0.286817 | 0.000413  |
| 12 | 1  | 0 | -2.386150 | -2.396274 | 0.000411  |
| 13 | 1  | 0 | -2.208632 | 0.680294  | 0.000330  |
| 14 | 6  | 0 | -4.122681 | -0.233997 | 0.000658  |
| 15 | 6  | 0 | -5.094870 | -1.395290 | 0.000782  |
| 16 | 6  | 0 | -4.867945 | 0.931457  | 0.000833  |
| 17 | 6  | 0 | -6.264602 | 0.587113  | 0.001092  |
| 18 | 6  | 0 | -7.394389 | 1.374537  | 0.001320  |
| 19 | 6  | 0 | -8.676377 | 0.760372  | 0.001592  |
| 20 | 7  | 0 | -9.728069 | 0.261256  | 0.001815  |
| 21 | 6  | 0 | -7.333152 | 2.792593  | 0.001310  |
| 22 | 7  | 0 | -7.326313 | 3.956888  | 0.001309  |
| 23 | 6  | 0 | -4.299176 | 2.226834  | 0.000765  |
| 24 | 7  | 0 | -3.734363 | 3.244566  | 0.000741  |
| 25 | 6  | 0 | -5.039620 | -2.236023 | -1.270915 |
| 26 | 1  | 0 | -4.101532 | -2.793065 | -1.334252 |
| 27 | 1  | 0 | -5.870533 | -2.946924 | -1.270698 |
| 28 | 1  | 0 | -5.124300 | -1.598339 | -2.154725 |
| 29 | 6  | 0 | -5.038992 | -2.236258 | 1.272295  |
| 30 | 1  | 0 | -5.869887 | -2.947181 | 1.272337  |
| 31 | 1  | 0 | -4.100857 | -2.793288 | 1.335080  |
| 32 | 1  | 0 | -5.123268 | -1.598743 | 2.156266  |
| 33 | 6  | 0 | 5.907579  | -0.289428 | -0.001002 |
| 34 | 16 | 0 | 4.883530  | 1.130156  | -0.000864 |
| 35 | 6  | 0 | 7.438612  | 1.853939  | -0.001295 |
| 36 | 6  | 0 | 6.178793  | 2.328307  | -0.001097 |
| 37 | 16 | 0 | 7.617986  | 0.103776  | -0.001297 |
| 38 | 6  | 0 | 8.714427  | 2.636101  | -0.001503 |
| 39 | 1  | 0 | 8.518496  | 3.709811  | -0.001542 |
| 40 | 1  | 0 | 9.319262  | 2.404833  | 0.882655  |
| 41 | 1  | 0 | 9.319043  | 2.404726  | -0.885782 |
| 42 | 6  | 0 | 5.728085  | 3.754881  | -0.001025 |
| 43 | 1  | 0 | 6.579439  | 4.438010  | -0.001367 |
| 44 | 1  | 0 | 5.119008  | 3.976739  | -0.884721 |
| 45 | 1  | 0 | 5.119623  | 3.976846  | 0.883070  |
| 46 | 6  | 0 | 0.267402  | -2.503533 | -0.000030 |
| 47 | 6  | 0 | -0.508611 | -1.375728 | 0.000060  |
| 48 | 1  | 0 | -0.233073 | -3.472246 | 0.000098  |
| 49 | 1  | 0 | -0.032590 | -0.395669 | -0.000052 |
| 50 | 8  | 0 | -6.396439 | -0.744336 | 0.001153  |

-----  
 E(RB3P86) = -2364.29569888 A.U.

11

Standard orientation:

| Center<br>Number | Atomic<br>Number | Atomic<br>Type | Coordinates (Angstroms) |           |           |
|------------------|------------------|----------------|-------------------------|-----------|-----------|
|                  |                  |                | X                       | Y         | Z         |
| 1                | 6                | 0              | 7.065534                | 1.117190  | -0.389797 |
| 2                | 6                | 0              | 7.677783                | -0.040067 | -0.075658 |
| 3                | 16               | 0              | 5.302008                | 1.105107  | -0.377338 |
| 4                | 6                | 0              | 5.105905                | -0.573026 | 0.083706  |
| 5                | 16               | 0              | 6.629046                | -1.402753 | 0.304346  |
| 6                | 6                | 0              | 3.902980                | -1.202313 | 0.261058  |
| 7                | 6                | 0              | 2.635606                | -0.595298 | 0.096240  |
| 8                | 1                | 0              | 3.926491                | -2.251278 | 0.549389  |
| 9                | 6                | 0              | 1.439500                | -1.240038 | 0.275388  |
| 10               | 1                | 0              | 2.605544                | 0.455721  | -0.195043 |
| 11               | 6                | 0              | 0.186701                | -0.608698 | 0.098863  |
| 12               | 1                | 0              | 1.443676                | -2.290099 | 0.565505  |
| 13               | 6                | 0              | -1.028228               | -1.225795 | 0.266380  |

S22

|    |   |   |           |           |           |
|----|---|---|-----------|-----------|-----------|
| 14 | 1 | 0 | 0.195362  | 0.442616  | -0.193425 |
| 15 | 6 | 0 | -2.247601 | -0.545153 | 0.068399  |
| 16 | 1 | 0 | -1.058716 | -2.274779 | 0.554630  |
| 17 | 6 | 0 | -3.512850 | -1.096211 | 0.181261  |
| 18 | 1 | 0 | -2.192884 | 0.502839  | -0.216819 |
| 19 | 6 | 0 | -4.711188 | -0.308008 | -0.041638 |
| 20 | 6 | 0 | -3.600421 | -2.469878 | 0.561973  |
| 21 | 6 | 0 | -5.919501 | -0.862457 | -0.417053 |
| 22 | 6 | 0 | -4.617936 | 1.157978  | 0.152261  |
| 23 | 7 | 0 | -3.582004 | -3.572662 | 0.934168  |
| 24 | 6 | 0 | -7.122476 | -0.094752 | -0.457836 |
| 25 | 6 | 0 | -6.081930 | -2.216766 | -0.833827 |
| 26 | 6 | 0 | -4.088559 | 1.678949  | 1.341895  |
| 27 | 6 | 0 | -5.060882 | 2.042326  | -0.839322 |
| 28 | 7 | 0 | -8.130391 | 0.486396  | -0.497247 |
| 29 | 7 | 0 | -6.269859 | -3.294376 | -1.231228 |
| 30 | 6 | 0 | -4.020643 | 3.052863  | 1.539258  |
| 31 | 6 | 0 | -4.976804 | 3.416429  | -0.644533 |
| 32 | 1 | 0 | -3.750824 | 0.998564  | 2.118056  |
| 33 | 1 | 0 | -5.460558 | 1.649082  | -1.768824 |
| 34 | 6 | 0 | -4.461826 | 3.924445  | 0.545426  |
| 35 | 1 | 0 | -3.625957 | 3.443510  | 2.472660  |
| 36 | 1 | 0 | -5.317985 | 4.090641  | -1.424354 |
| 37 | 1 | 0 | -4.405172 | 4.998254  | 0.699137  |
| 38 | 6 | 0 | 9.146919  | -0.315841 | -0.008500 |
| 39 | 1 | 0 | 9.442468  | -0.637636 | 0.996559  |
| 40 | 1 | 0 | 9.431172  | -1.110965 | -0.707074 |
| 41 | 1 | 0 | 9.727825  | 0.573357  | -0.259813 |
| 42 | 6 | 0 | 7.696293  | 2.424747  | -0.751087 |
| 43 | 1 | 0 | 7.400815  | 3.212823  | -0.049076 |
| 44 | 1 | 0 | 8.785478  | 2.354932  | -0.736123 |
| 45 | 1 | 0 | 7.393917  | 2.745501  | -1.754513 |

-----  
 E(RB3P86) = -1850.96261387 A.U.

## 12

Standard orientation:

| Center<br>Number | Atomic<br>Number | Atomic<br>Type | Coordinates (Angstroms) |           |           |
|------------------|------------------|----------------|-------------------------|-----------|-----------|
|                  |                  |                | X                       | Y         | Z         |
| 1                | 6                | 0              | -8.490526               | -0.112850 | -0.000106 |
| 2                | 6                | 0              | -7.919349               | 1.105554  | -0.000147 |
| 3                | 16               | 0              | -6.160656               | 1.151273  | -0.000084 |
| 4                | 6                | 0              | -5.904940               | -0.582147 | 0.000010  |
| 5                | 16               | 0              | -7.399537               | -1.492528 | 0.000003  |
| 6                | 6                | 0              | -4.679235               | -1.192468 | 0.000078  |
| 7                | 6                | 0              | -3.435983               | -0.516402 | 0.000084  |
| 8                | 6                | 0              | -2.213636               | -1.135588 | 0.000148  |
| 9                | 6                | 0              | -0.987571               | -0.429104 | 0.000151  |
| 10               | 6                | 0              | 0.254666                | -1.009703 | 0.000205  |
| 11               | 6                | 0              | 1.456422                | -0.263294 | 0.000199  |
| 12               | 6                | 0              | 2.707829                | -0.825924 | 0.000228  |
| 13               | 6                | 0              | 3.945498                | -0.141578 | 0.000209  |
| 14               | 6                | 0              | 5.186848                | -0.752177 | 0.000089  |
| 15               | 6                | 0              | 4.175626                | 1.355642  | 0.000252  |
| 16               | 8                | 0              | 5.626203                | 1.473169  | 0.000034  |
| 17               | 6                | 0              | 6.202924                | 0.265855  | -0.000038 |
| 18               | 6                | 0              | 7.577300                | 0.177960  | -0.000229 |
| 19               | 6                | 0              | 8.260414                | -1.066222 | -0.000337 |
| 20               | 7                | 0              | 8.858509                | -2.065167 | -0.000429 |
| 21               | 6                | 0              | 8.355014                | 1.367820  | -0.000326 |
| 22               | 7                | 0              | 8.995280                | 2.340078  | -0.000406 |
| 23               | 6                | 0              | 3.693056                | 2.046416  | 1.271935  |
| 24               | 6                | 0              | 3.692615                | 2.046518  | -1.271205 |
| 25               | 1                | 0              | -4.663660               | -2.280521 | 0.000129  |
| 26               | 1                | 0              | -3.448777               | 0.574641  | 0.000032  |
| 27               | 1                | 0              | -2.174181               | -2.224504 | 0.000197  |

|    |   |   |            |           |           |
|----|---|---|------------|-----------|-----------|
| 28 | 1 | 0 | -1.044456  | 0.660807  | 0.000100  |
| 29 | 1 | 0 | 0.330982   | -2.096423 | 0.000250  |
| 30 | 1 | 0 | 1.351915   | 0.820432  | 0.000141  |
| 31 | 1 | 0 | 2.776083   | -1.912796 | 0.000222  |
| 32 | 1 | 0 | 4.092604   | 1.542666  | 2.155959  |
| 33 | 1 | 0 | 4.038719   | 3.083908  | 1.273275  |
| 34 | 1 | 0 | 2.601969   | 2.040289  | 1.333444  |
| 35 | 1 | 0 | 2.601505   | 2.040344  | -1.332349 |
| 36 | 1 | 0 | 4.038236   | 3.084024  | -1.272555 |
| 37 | 1 | 0 | 4.091893   | 1.542869  | -2.155409 |
| 38 | 6 | 0 | 5.372557   | -2.154623 | 0.000013  |
| 39 | 7 | 0 | 5.418602   | -3.317646 | -0.000033 |
| 40 | 6 | 0 | -9.956800  | -0.407037 | -0.000148 |
| 41 | 1 | 0 | -10.247482 | -0.986085 | -0.884212 |
| 42 | 1 | 0 | -10.247551 | -0.985994 | 0.883953  |
| 43 | 1 | 0 | -10.534039 | 0.520343  | -0.000218 |
| 44 | 6 | 0 | -8.634715  | 2.426812  | -0.000242 |
| 45 | 1 | 0 | -9.267721  | 2.533510  | -0.887264 |
| 46 | 1 | 0 | -9.267779  | 2.533607  | 0.886726  |
| 47 | 1 | 0 | -7.929618  | 3.262005  | -0.000265 |

-----  
E (RB3P86) = -1889.36358206 A.U.
